# Supplementary material
Source: PubMed Central journal article supplement (PMC2427189)

# NIC12(dppp) Coupling Propyl

Meg Collins  
MLC:11.96 Grignard Propyl Crude

|                        |                |                        |                                 |                |                |                      |              |
|------------------------|----------------|------------------------|---------------------------------|----------------|----------------|----------------------|--------------|
| Acquisition Time (sec) | 2.0480         | Comment                | MLC:11.96 Grignard Propyl Crude | Date           | Aug 23 2002    | Number of Transients | 1            |
| File Name              | G:196GrigPropC | Frequency (MHz)        | 399.95                          | Nucleus        | <sup>1</sup> H | Solvent              | CHLOROFORM-D |
| Original Points Count  | 32768          | Points Count           | 32768                           | Pulse Sequence | s2pul          |                      |              |
| Sweep Width (Hz)       | 8000.00        | Temperature (degree C) | 29.000                          |                |                |                      |              |

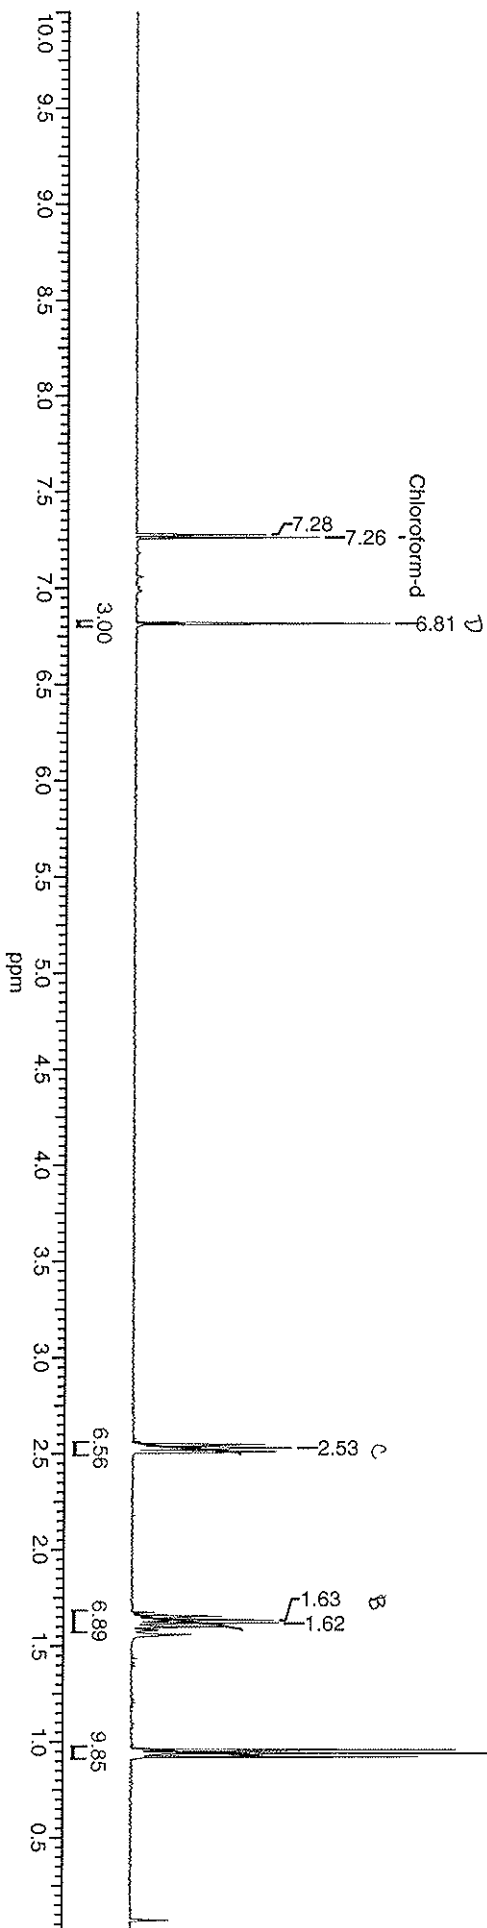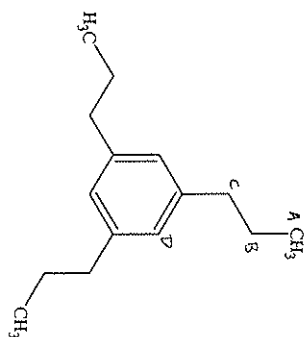

# NIC12 Coupling Butyl Crude

Meg Collins  
MLC.II.149 NIC12 Coupling Butyl Crude

|                        |             |                        |                                       |                      |                |
|------------------------|-------------|------------------------|---------------------------------------|----------------------|----------------|
| Acquisition Time (sec) | 2.0480      | Comment                | MLC.II.149 NIC12 Coupling Butyl Crude | Date                 | Nov 15 2002    |
| File Name              | G:\149NIC12 | Points Count           | 32768                                 | Nucleus              | <sup>1</sup> H |
| Original Points Count  | 32768       | Temperature (degree C) | 29.000                                | Solvent              | CHLOROFORM-D   |
| Sweep Width (Hz)       | 8000.00     | Frequency (MHz)        | 399.95                                | Pulse Sequence       | s2pul          |
|                        |             |                        |                                       | Number of Transients | 32             |

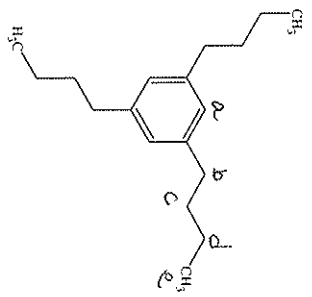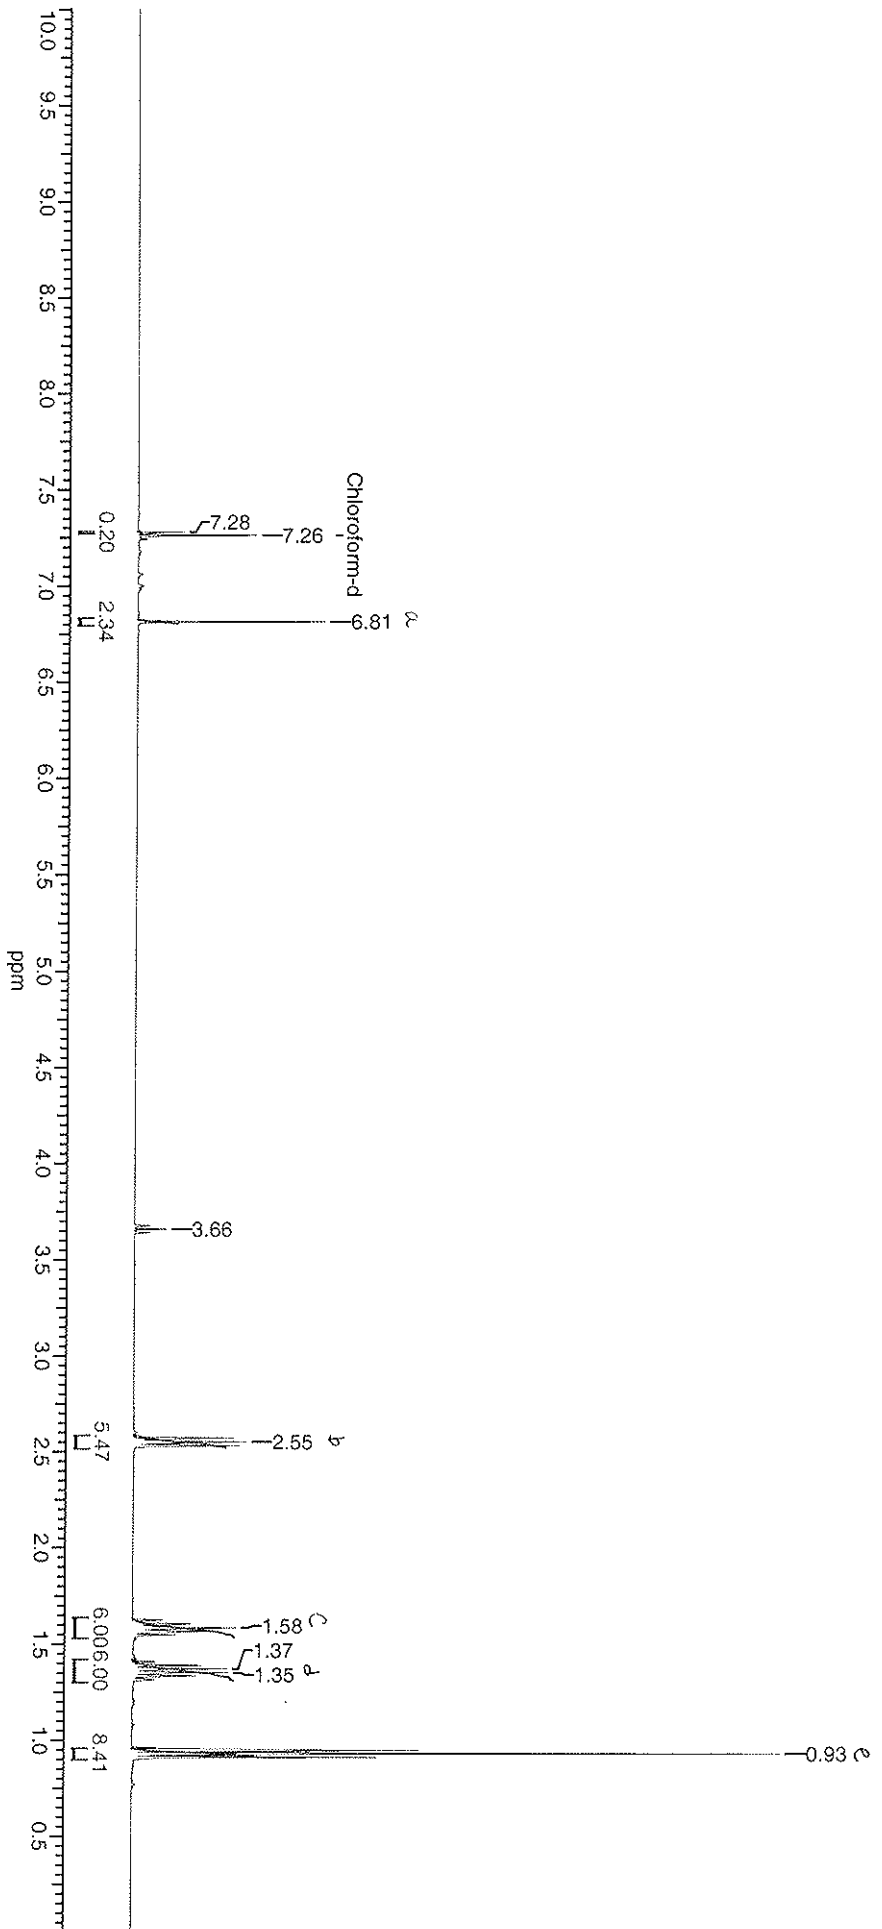

# Pentyl Benzene

Meg Collins  
MLC.III.81 Pentyl Silica Plug

|                        |                |                        |                               |                      |                |
|------------------------|----------------|------------------------|-------------------------------|----------------------|----------------|
| Acquisition Time (sec) | 2.3323         | Comment                | MLC.III.81 Pentyl Silica Plug | Date                 | Jun 18 2004    |
| File Name              | Z:\81 PentylSP | Frequency (MHz)        | 499.70                        | Nucleus              | <sup>1</sup> H |
| Original Points Count  | 32768          | Points Count           | 32768                         | Solvent              | CHLOROFORM-D   |
| Sweep Width (Hz)       | 7024.94        | Temperature (degree C) | 29.000                        | Pulse Sequence       | s2pul          |
|                        |                |                        |                               | Number of Transients | 32             |

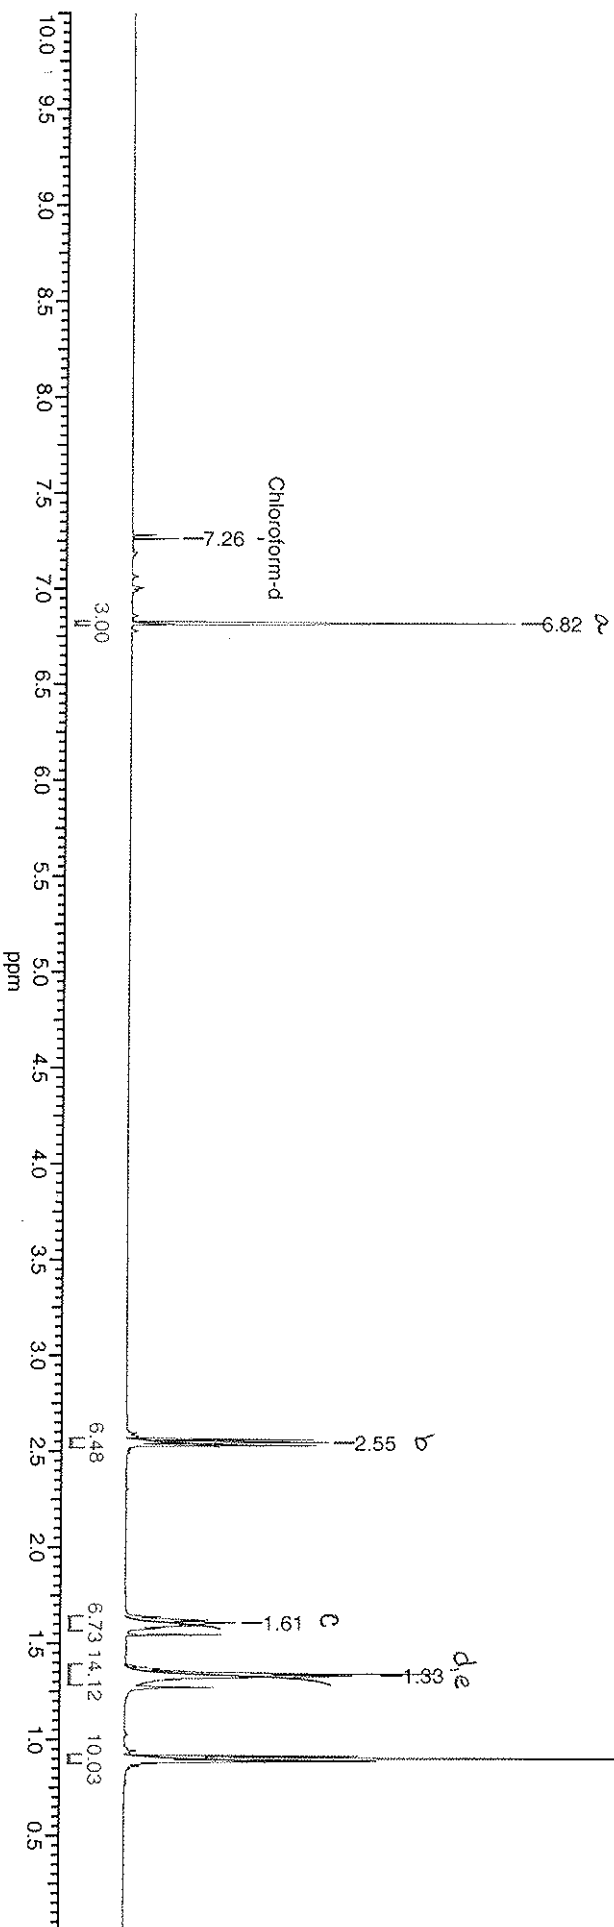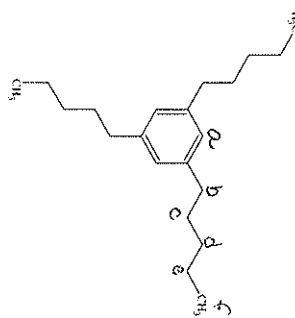

# Trihexylbenzene ~~Crude~~

Meg Collins  
MLC.III.43 Trihexylbenzene SP

|                        |                   |                        |                               |
|------------------------|-------------------|------------------------|-------------------------------|
| Acquisition Time (sec) | 2.0480            | Comment                | MLC.III.43 Trihexylbenzene SP |
| File Name              | Z:\43TrihexBenzSP | Date                   | Mar 26 2004                   |
| Original Points Count  | 32768             | Nucleus                | <sup>1</sup> H                |
| Sweep Width (Hz)       | 8000.00           | Pulse Sequence         | s2pul                         |
|                        |                   | Points Count           | 32768                         |
|                        |                   | Solvent                | CHLOROFORM-D                  |
|                        |                   | Temperature (degree C) | 29.000                        |
|                        |                   | Frequency (MHz)        | 399.95                        |
|                        |                   | Number of Transients   | 32                            |

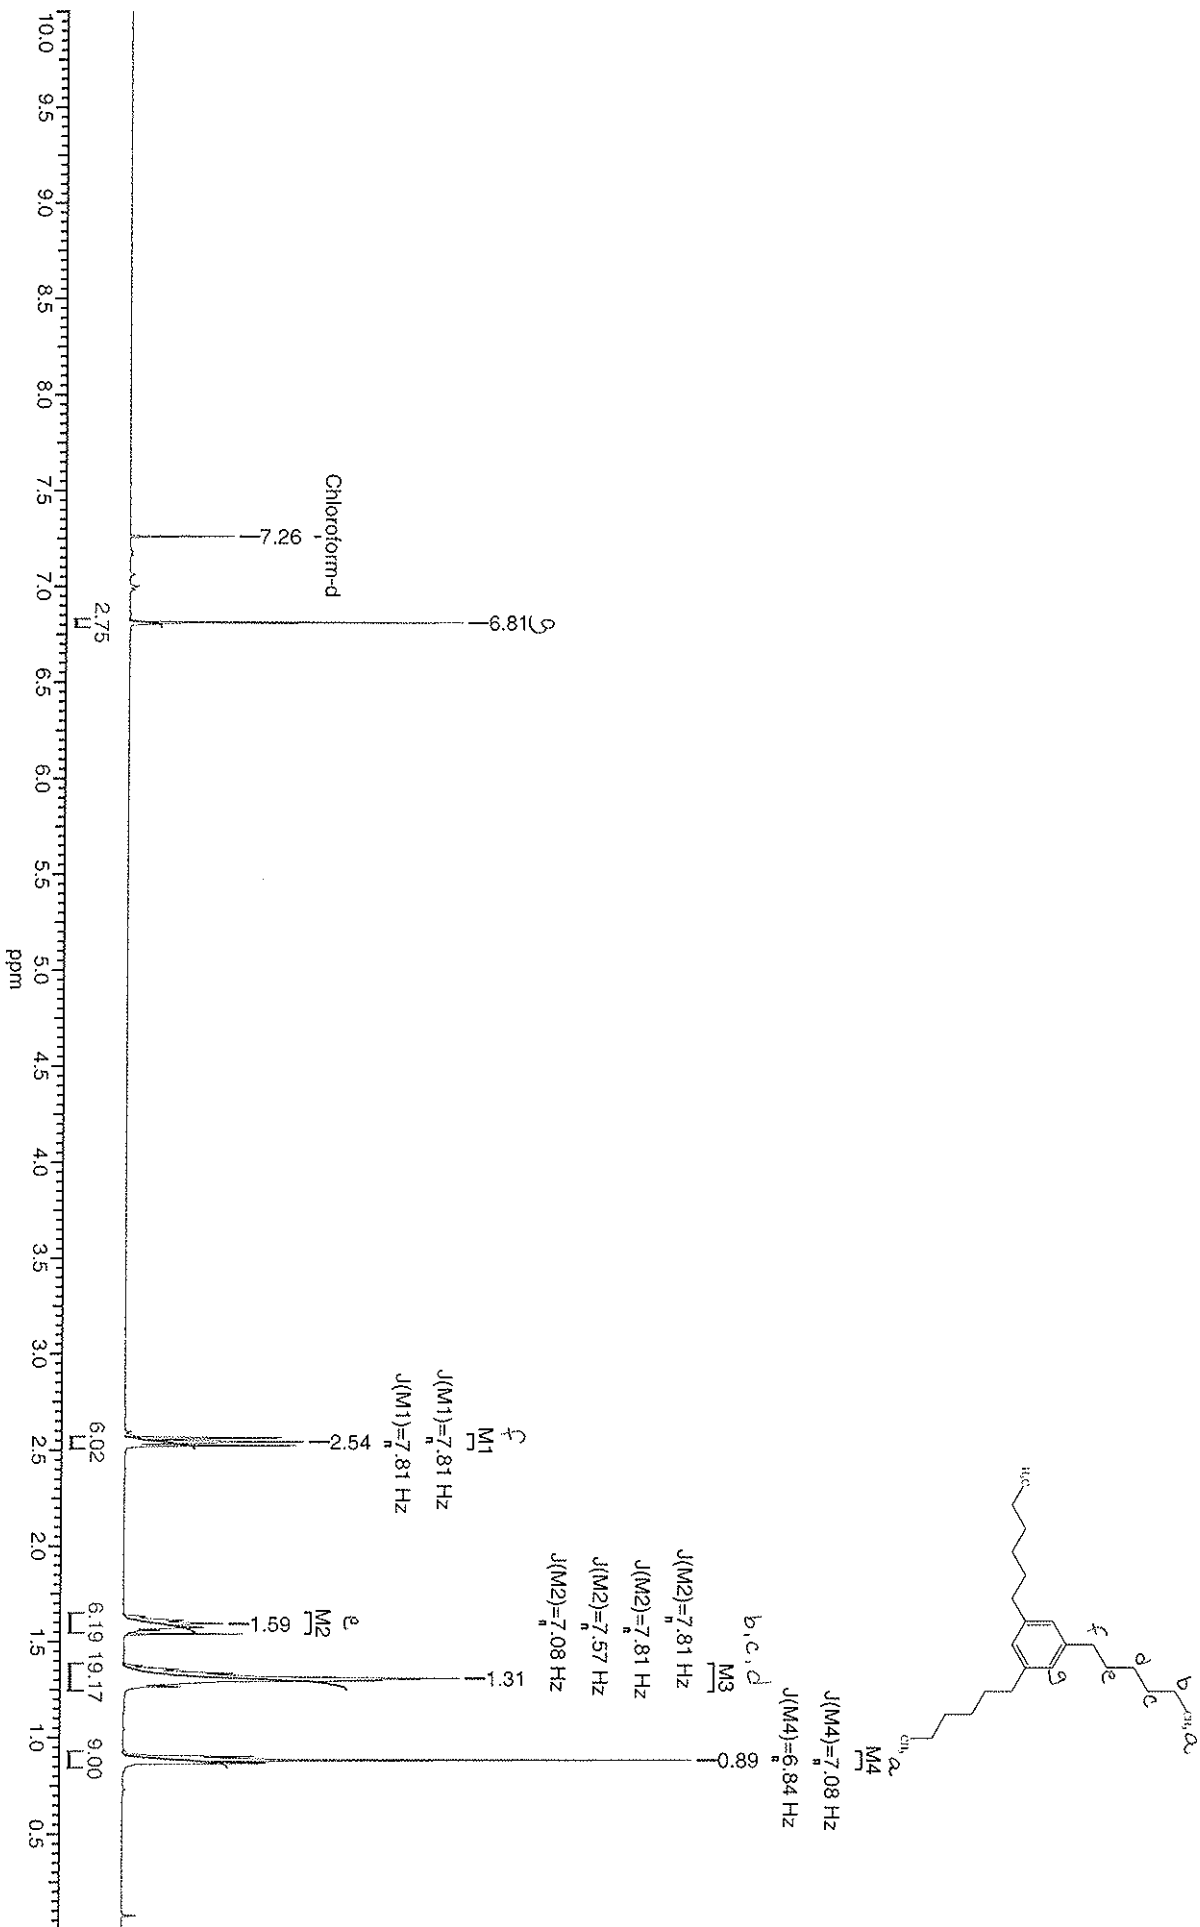

# NiCl Coupling 1-chloro-3,3-dimethylbutane

Meg Collins  
MLC.II.165 NiCl Coupling t-butyl crude

|                        |                   |                        |                                        |                      |                |
|------------------------|-------------------|------------------------|----------------------------------------|----------------------|----------------|
| Acquisition Time (sec) | 2.0480            | Comment                | MLC.II.165 NiCl Coupling t-butyl crude | Date                 | Feb 25 2003    |
| File Name              | Z:\165NiClCoupBut | Points Count           | 32768                                  | Nucleus              | <sup>1</sup> H |
| Original Points Count  | 32768             | Temperature (degree C) | 29.000                                 | Solvent              | CHLOROFORM-D   |
| Sweep Width (Hz)       | 8000.00           | Frequency (MHz)        | 399.95                                 | Pulse Sequence       | s2pul          |
|                        |                   |                        |                                        | Number of Transients | 32             |

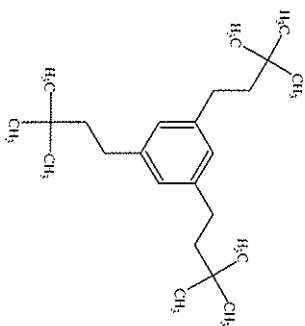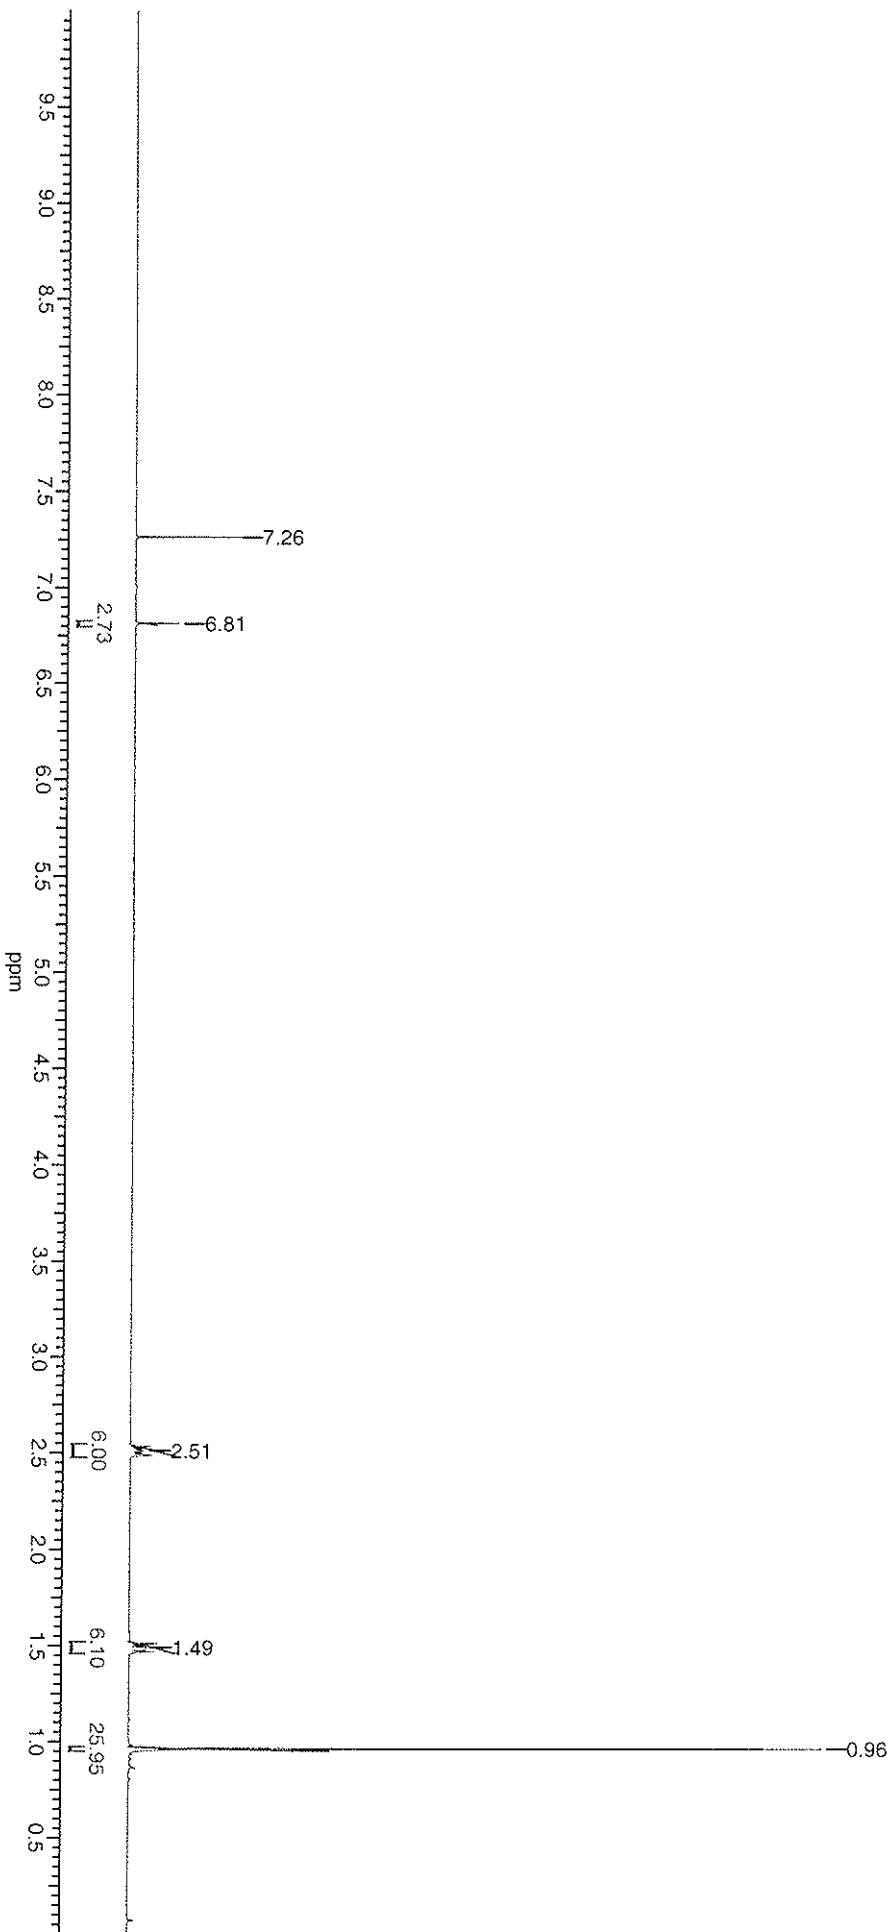

# Chloromethylation Propyl

Meg Collins  
MLC.11.103 Chloromethylation Propyl

|                        |                      |                        |                                     |                      |                |
|------------------------|----------------------|------------------------|-------------------------------------|----------------------|----------------|
| Acquisition Time (sec) | 2.0480               | Comment                | MLC.11.103 Chloromethylation Propyl | Date                 | Aug 28 2002    |
| File Name              | Z:\103ChloromethProp | Frequency (MHz)        | 399.95                              | Nucleus              | <sup>1</sup> H |
| Original Points Count  | 32768                | Points Count           | 32768                               | Pulse Sequence       | s2pul          |
| Sweep Width (Hz)       | 8000.00              | Temperature (degree C) | 29.000                              | Solvent              | CHLOROFORM-D   |
|                        |                      |                        |                                     | Number of Transients | 32             |

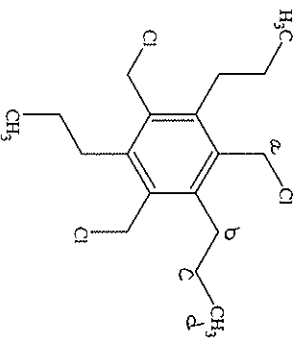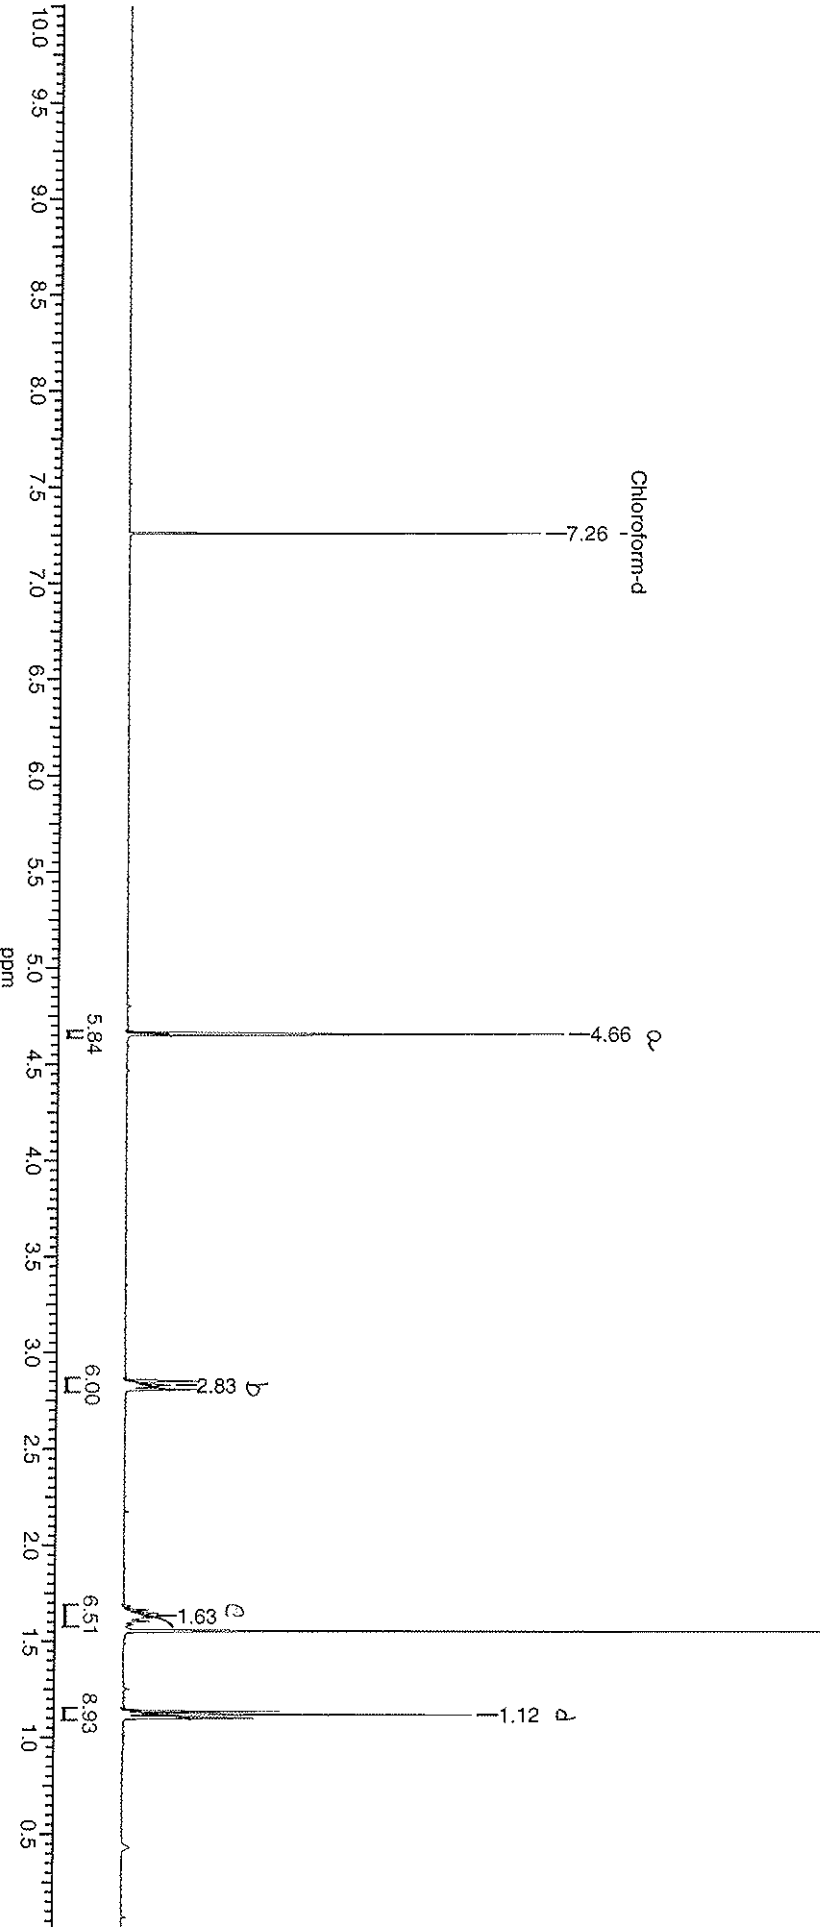

# Cyanide Addition Butyl

Meg Collins  
MLC-II, 131 Cyanide Addition Butyl

|                        |                |                        |                                    |                      |                |
|------------------------|----------------|------------------------|------------------------------------|----------------------|----------------|
| Acquisition Time (sec) | 1.9999         | Comment                | MLC-II, 131 Cyanide Addition Butyl | Date                 | Oct 18 2002    |
| File Name              | G:\131\CyanBut | Frequency (MHz)        | 499.70                             | Nucleus              | <sup>1</sup> H |
| Original Points Count  | 28099          | Pulse Sequence         | s2pul                              | Solvent              | CHLOROFORM-D   |
| Sweep Width (Hz)       | 7024.94        | Points Count           | 32768                              | Number of Transients | 32             |
|                        |                | Temperature (degree C) | 29.000                             |                      |                |

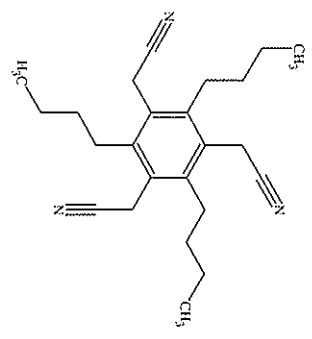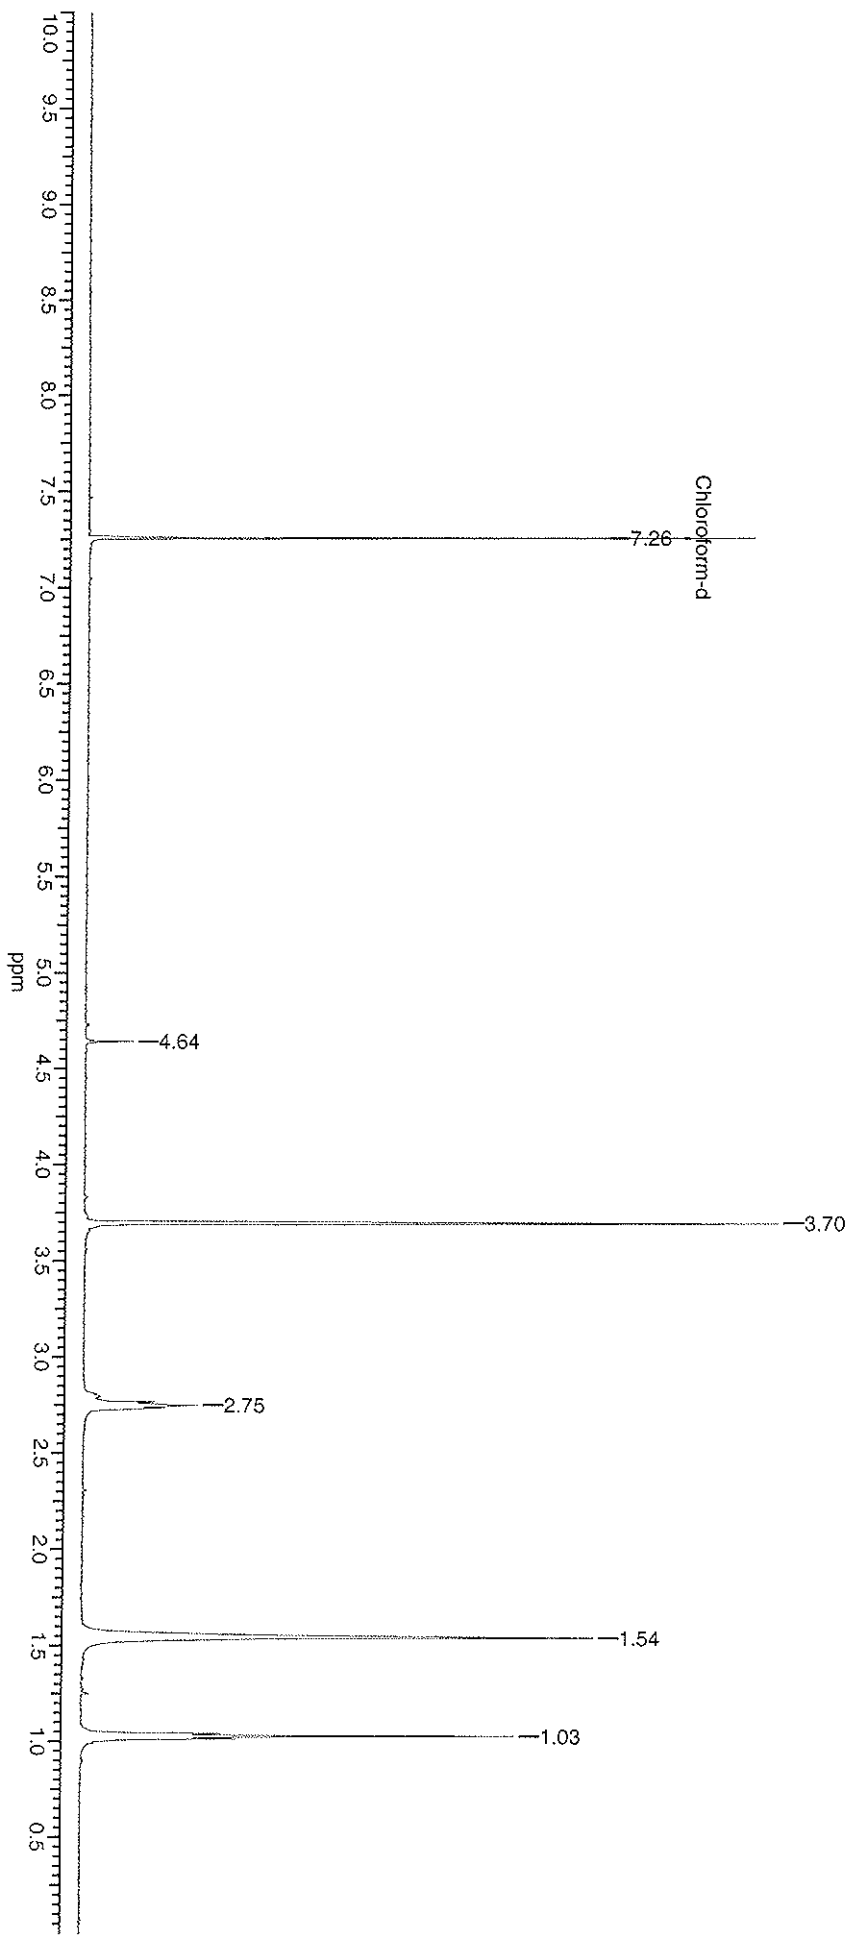

# Chloromethyl Pentyl

Meg  
MLC.III.83 Chloromethyl Pentyl

|                        |                   |                        |                                |                      |                |
|------------------------|-------------------|------------------------|--------------------------------|----------------------|----------------|
| Acquisition Time (sec) | 2.0480            | Comment                | MLC.III.83 Chloromethyl Pentyl | Date                 | Jun 28 2004    |
| File Name              | E:\83ChlorMeIPent | Points Count           | 32768                          | Nucleus              | <sup>1</sup> H |
| Original Points Count  | 32768             | Temperature (degree C) | 29.000                         | Solvent              | CHLOROFORM-D   |
| Sweep Width (Hz)       | 8000.00           | Frequency (MHz)        | 399.95                         | Pulse Sequence       | s2pul          |
|                        |                   |                        |                                | Number of Transients | 32             |

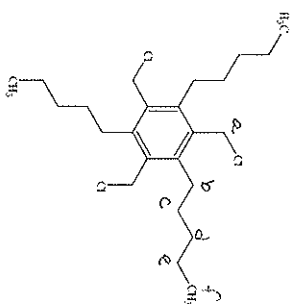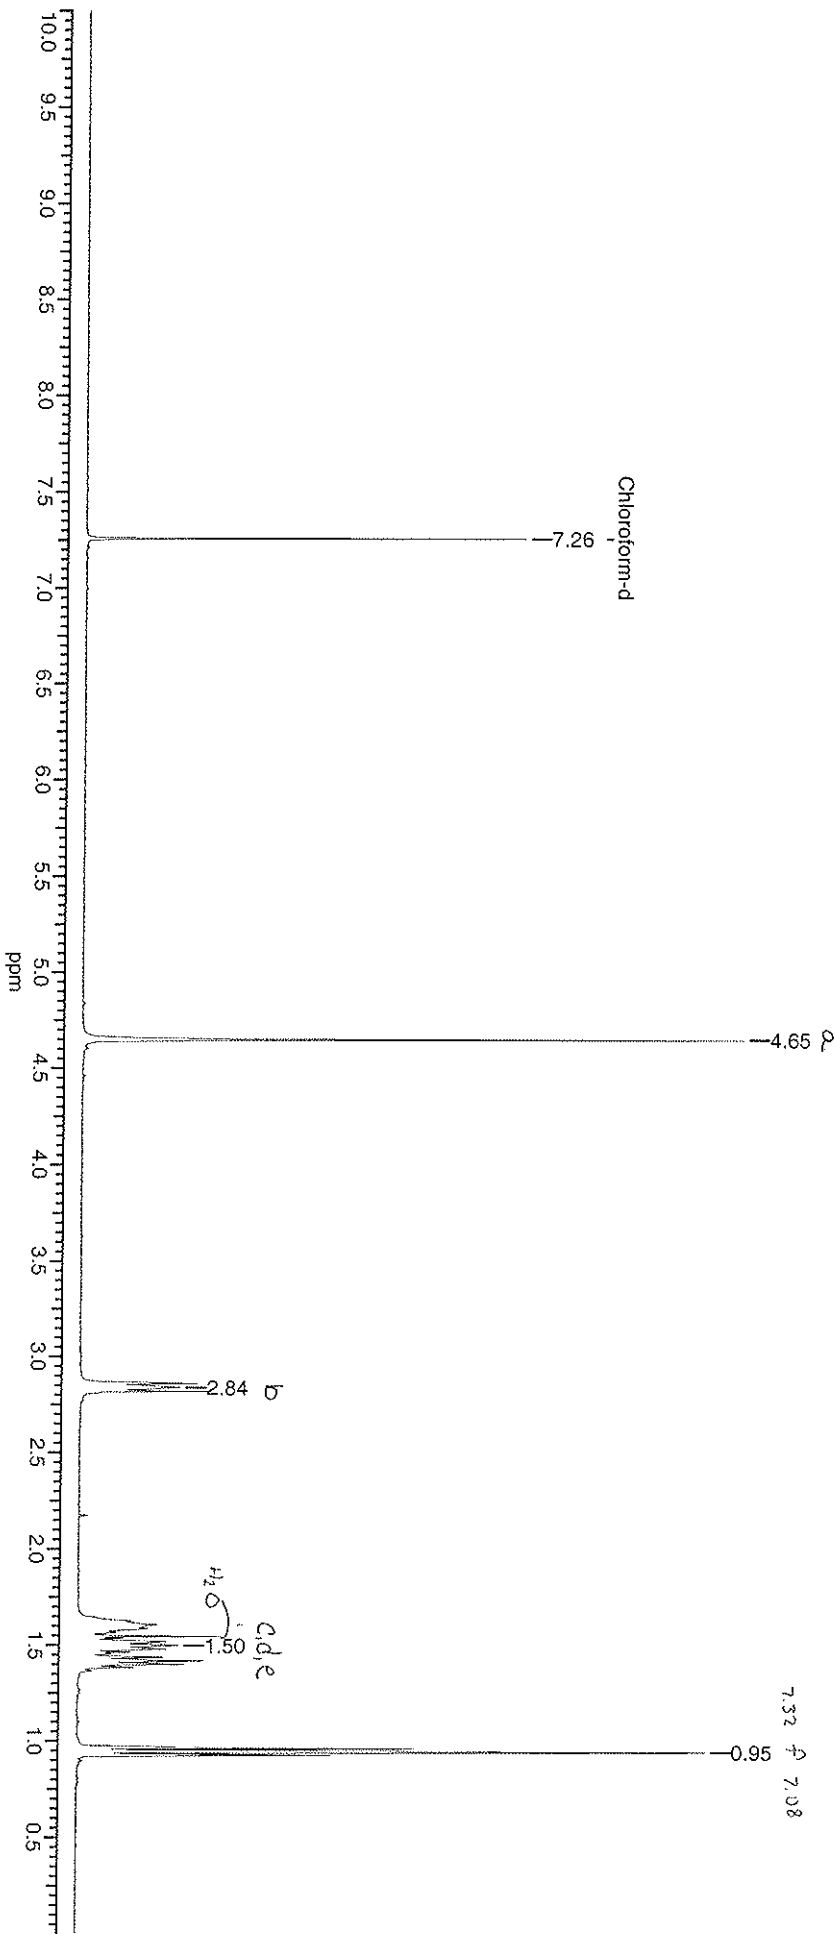



# Chloromethyl Hexyl

Meg Collins  
MLC Ill.53 Chloromethyl Hexyl

|                        |                   |                        |                               |         |                |                      |    |
|------------------------|-------------------|------------------------|-------------------------------|---------|----------------|----------------------|----|
| Acquisition Time (sec) | 2.0480            | Comment                | MLC Ill.53 Chloromethyl Hexyl | Date    | Jul 7 2004     | Number of Transients | 32 |
| File Name              | E:\53ChlorMethHex | Frequency (MHz)        | 399.95                        | Nucleus | <sup>1</sup> H |                      |    |
| Original Points Count  | 32768             | Pulse Sequence         | s2pul                         | Solvent | CHLOROFORM-D   |                      |    |
| Sweep Width (Hz)       | 8000.00           | Temperature (degree C) | 29.000                        |         |                |                      |    |

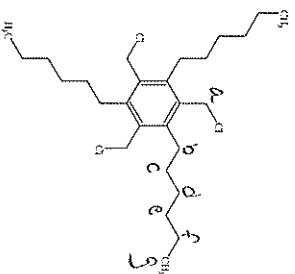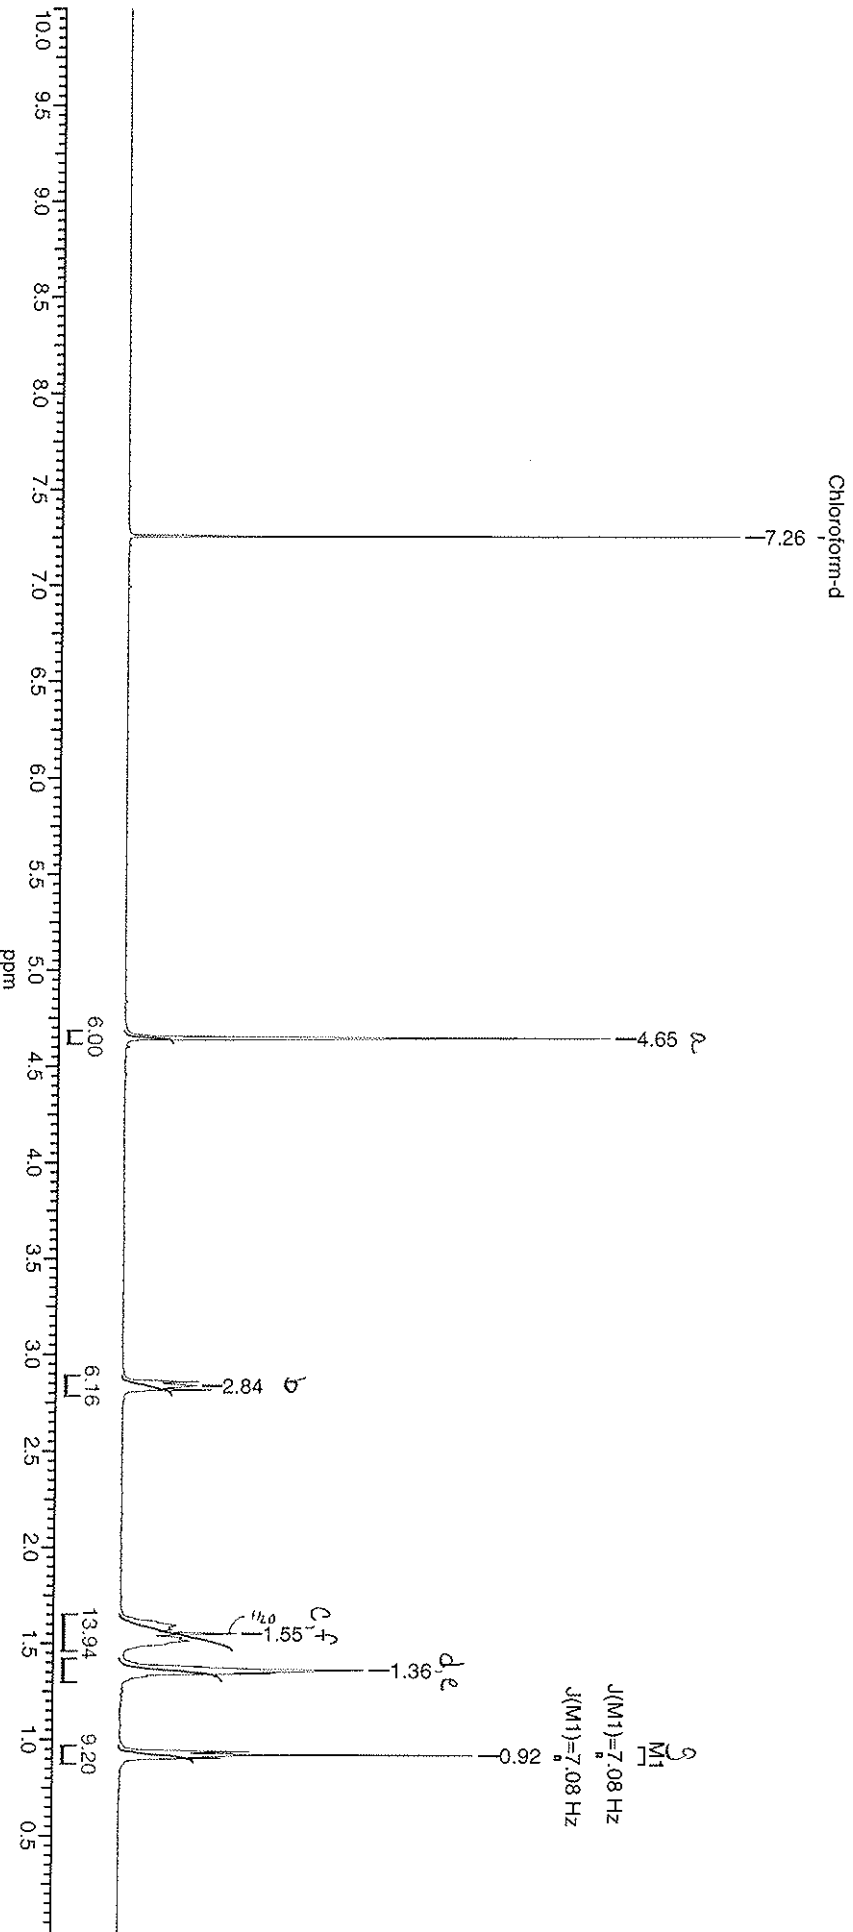

# Chloromethylation t-Butyl

Meg Collins  
MLC.II.169 Chloromethylation t-Butyl Crude

|                        |                   |                        |                                            |         |                |                      |    |
|------------------------|-------------------|------------------------|--------------------------------------------|---------|----------------|----------------------|----|
| Acquisition Time (sec) | 2.3323            | Comment                | MLC.II.169 Chloromethylation t-Butyl Crude | Date    | Feb 26 2003    | Number of Transients | 32 |
| File Name              | Z:\169ChlorMetBut | Points Count           | 32768                                      | Nucleus | <sup>1</sup> H | CHLOROFORM-D         |    |
| Original Points Count  | 32768             | Temperature (degree C) | 29.000                                     | Solvent |                |                      |    |
| Sweep Width (Hz)       | 7024.94           |                        |                                            |         |                |                      |    |

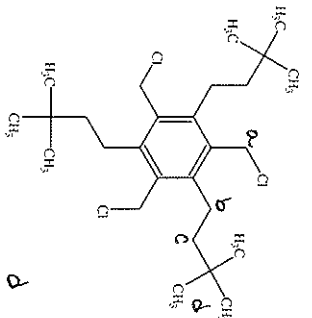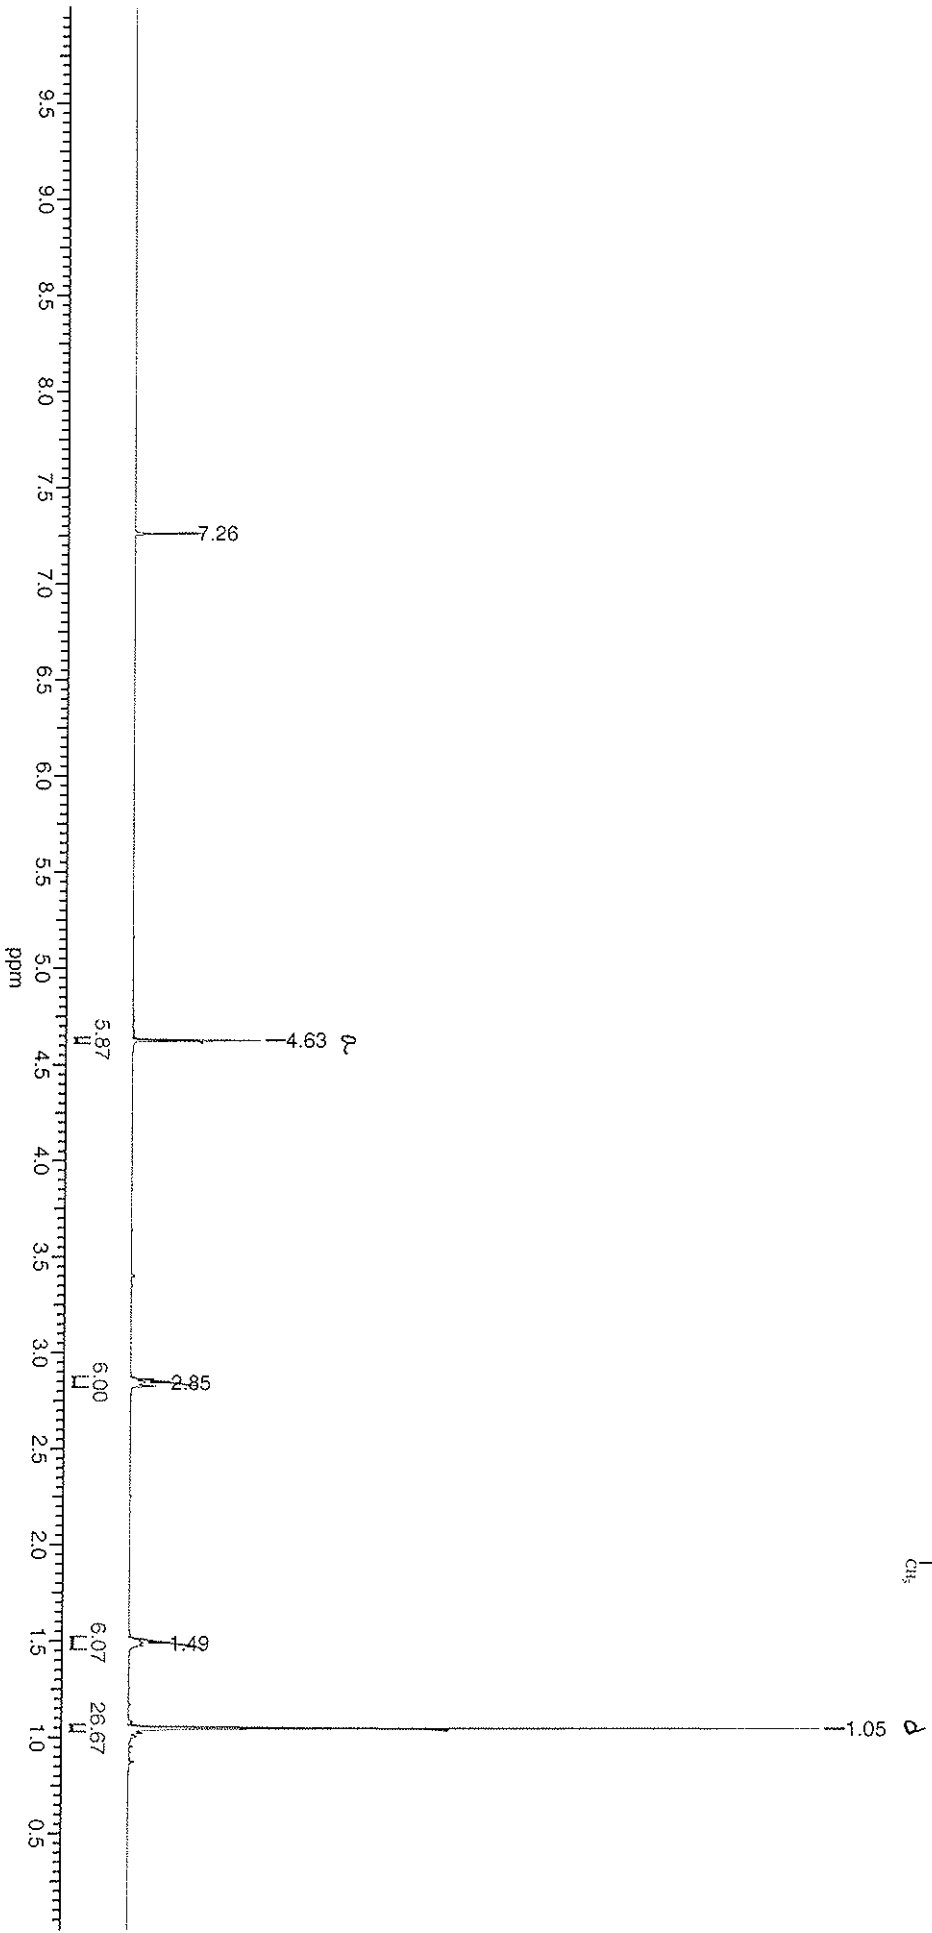

# Cyanide Addition Propyl

Meg Collins  
MLC.11.129 Cyanide Addition Propyl

|                        |                |                        |                                    |                |                |                      |    |
|------------------------|----------------|------------------------|------------------------------------|----------------|----------------|----------------------|----|
| Acquisition Time (sec) | 2.0480         | Comment                | MLC.11.129 Cyanide Addition Propyl | Date           | Oct 15 2002    | Number of Transients | 32 |
| File Name              | G:\129CyanProp | Frequency (MHz)        | 399.95                             | Nucleus        | <sup>1</sup> H | CHLOROFORM-D         |    |
| Original Points Count  | 32768          | Pulse Count            | 32768                              | Pulse Sequence | s2pul          |                      |    |
| Sweep Width (Hz)       | 8000.00        | Temperature (degree C) | 29.000                             | Solvent        |                |                      |    |

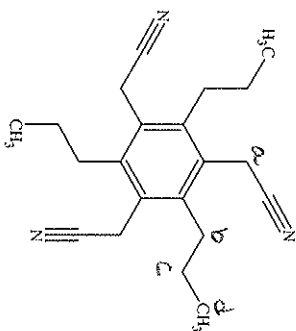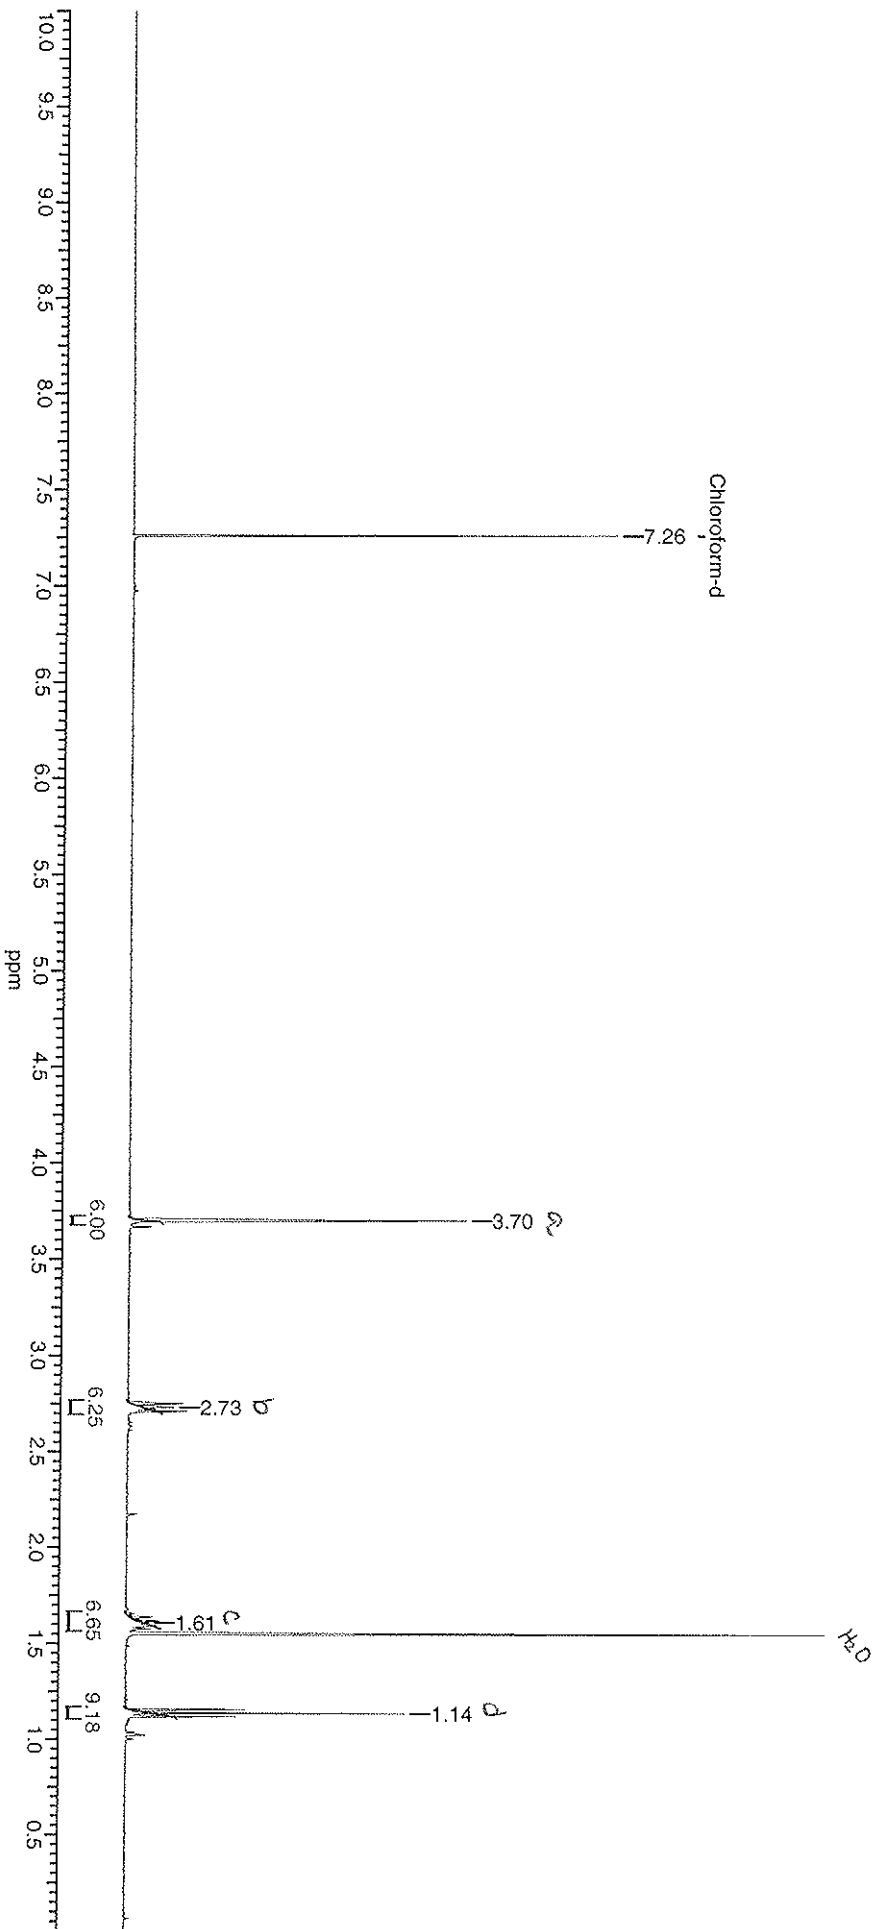

# Cyanide Addition

Meg Collins  
MLC.II.157 Cyanide Addition Butyl

|                        |                |                        |                                   |                      |                |
|------------------------|----------------|------------------------|-----------------------------------|----------------------|----------------|
| Acquisition Time (sec) | 2.0480         | Comment                | MLC.II.157 Cyanide Addition Butyl | Date                 | Dec 2 2002     |
| File Name              | E:\157 CyanAdd | Points Count           | 32768                             | Nucleus              | <sup>1</sup> H |
| Original Points Count  | 32768          | Temperature (degree C) | 29.000                            | Solvent              | CHLOROFORM-D   |
| Sweep Width (Hz)       | 8000.00        | Frequency (MHz)        | 399.95                            | Pulse Sequence       | s2pul          |
|                        |                |                        |                                   | Number of Transients | 32             |

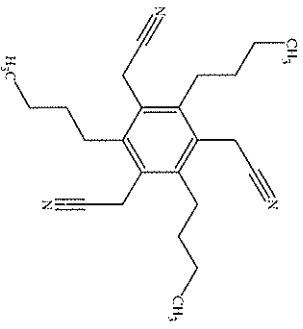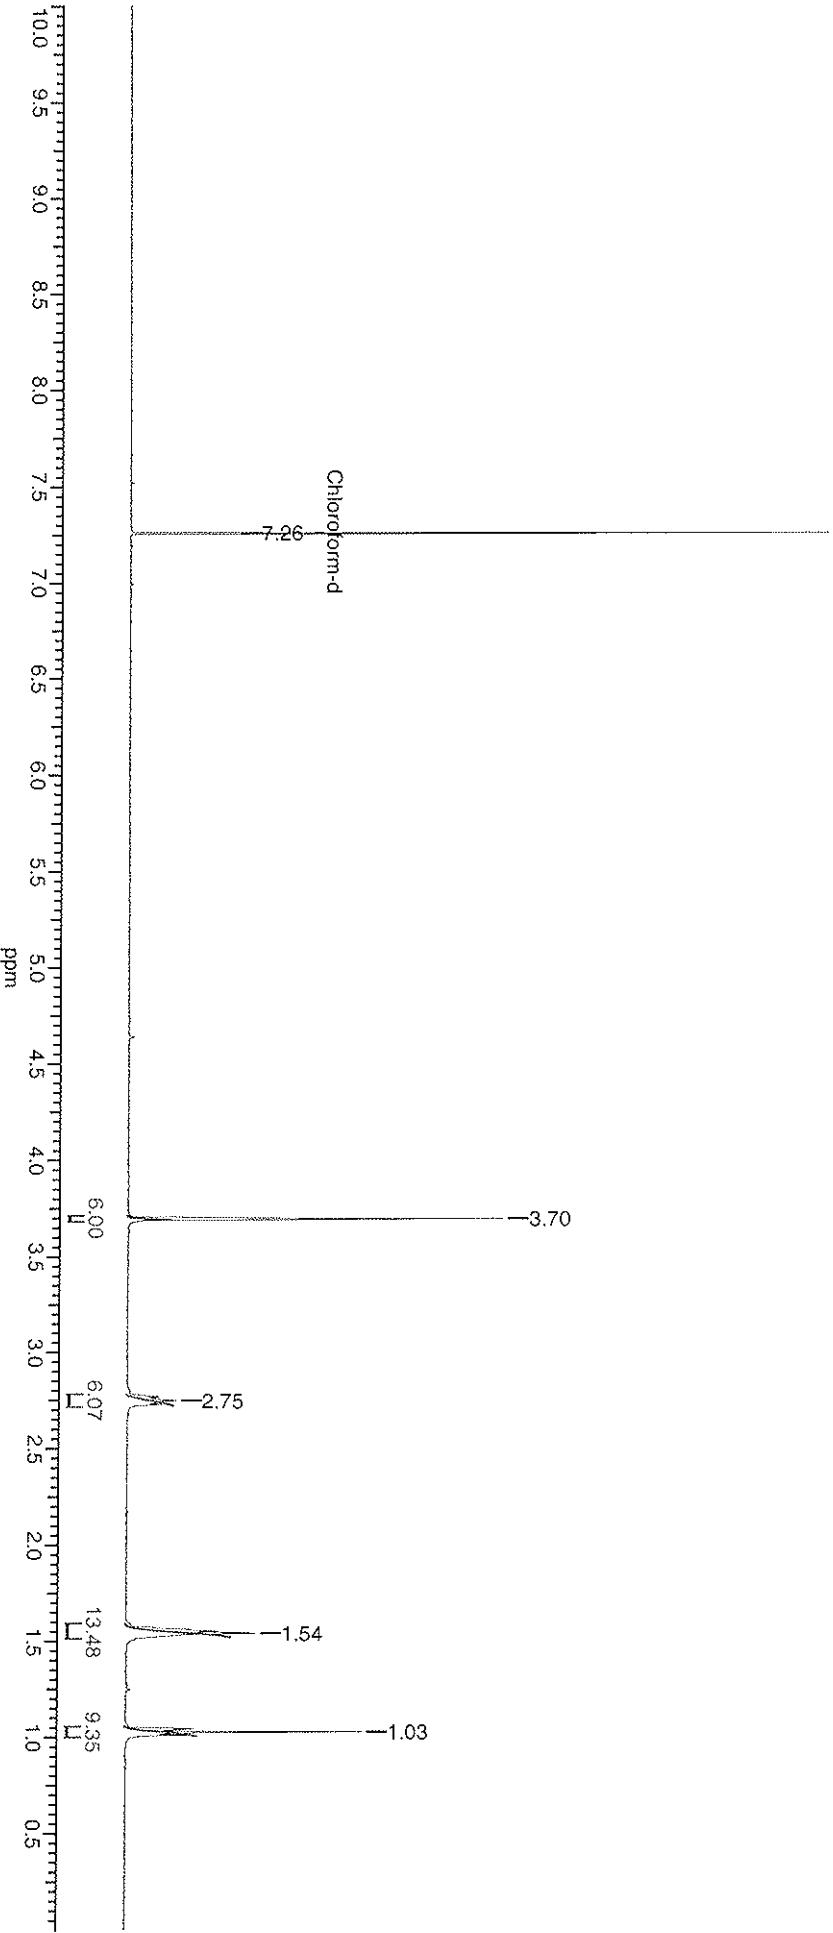

# Nitrile Chloromethyl Pentyl

Meg Collins  
MLC, Ill 89 Pentyl Nitrile

|                        |               |                        |                            |
|------------------------|---------------|------------------------|----------------------------|
| Acquisition Time (sec) | 2.0480        | Comment                | MLC, Ill 89 Pentyl Nitrile |
| File Name              | E:\89PentNitr | Frequency (MHz)        | 399.95                     |
| Original Points Count  | 32768         | Pulse Sequence         | s2pul                      |
| Sweep Width (Hz)       | 8000.00       | Temperature (degree C) | 29.000                     |
|                        |               | Date                   | Jun 29 2004                |
|                        |               | Nucleus                | <sup>1</sup> H             |
|                        |               | Solvent                | CHLOROFORM-D               |
|                        |               | Number of Transients   | 32                         |

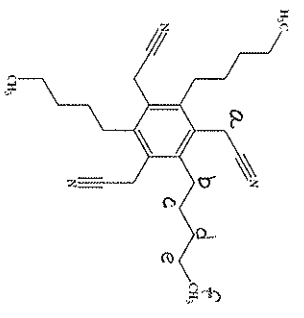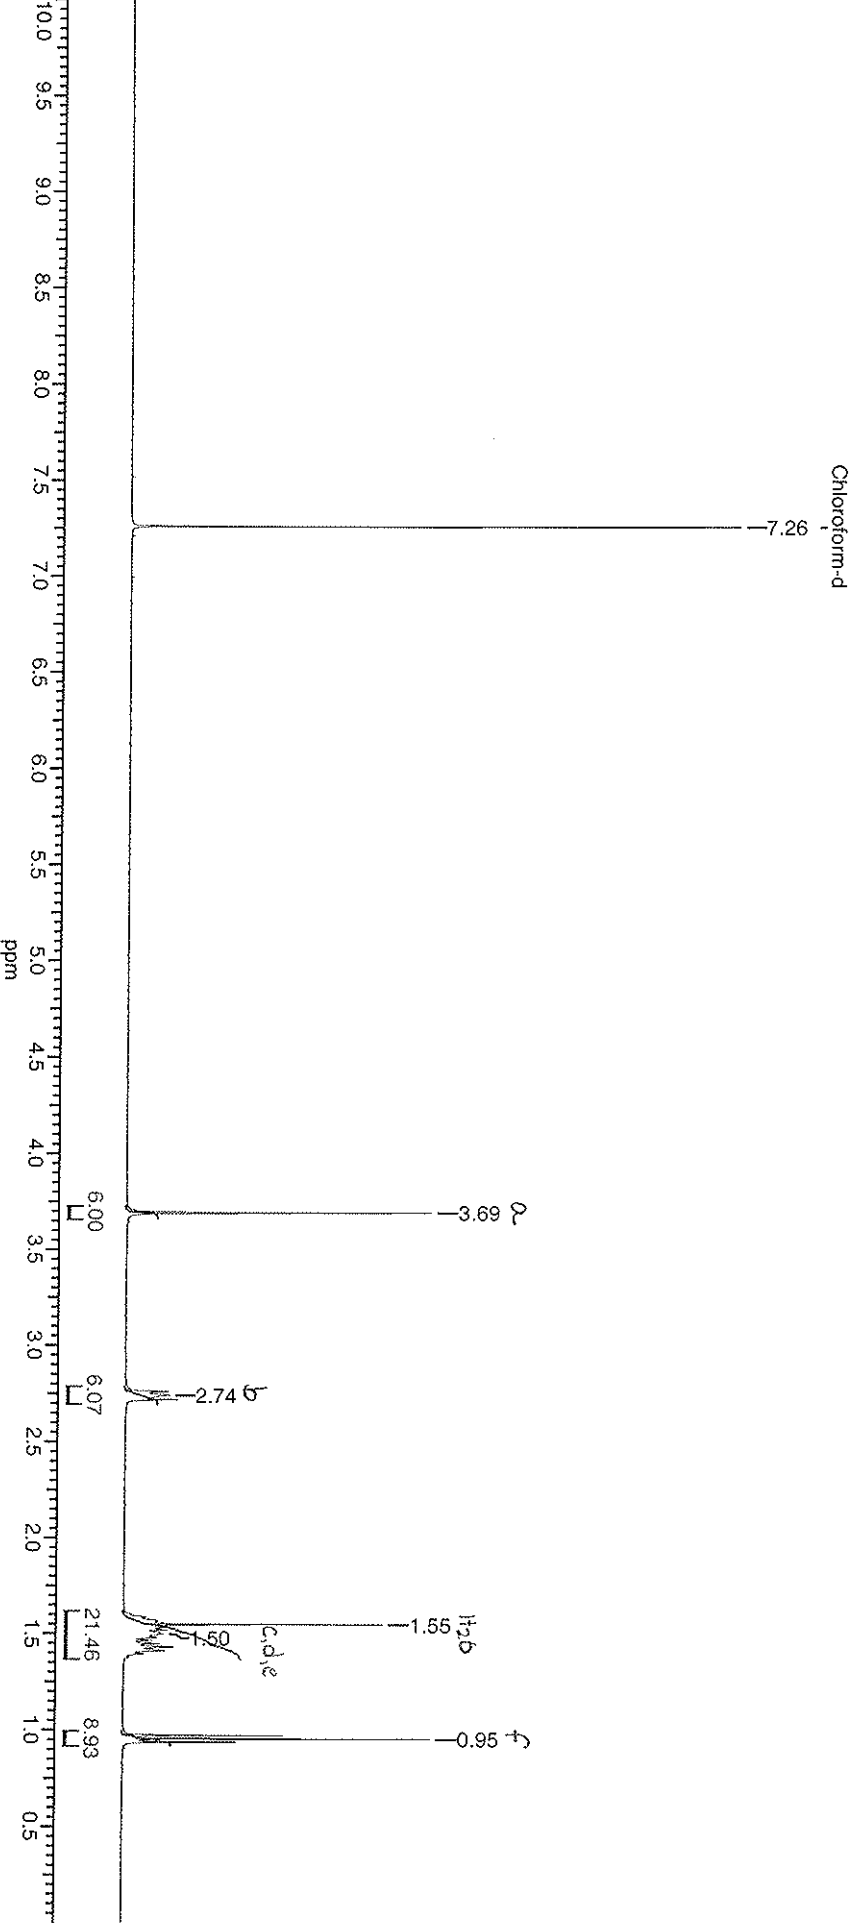

# Nitrile Hexyl

Meg Collins  
MLC.III.95 Nitrile Hexyl

| Acquisition Time (sec) | 2.0480       | Comment                | MLC.III.95 Nitrile Hexyl | Date                 | Jul 10 2004    |
|------------------------|--------------|------------------------|--------------------------|----------------------|----------------|
| File Name              | E:\95NitrHex | Frequency (MHz)        | 399.95                   | Nucleus              | <sup>1</sup> H |
| Original Points Count  | 32768        | Pulse Sequence         | s2pul                    | Solvent              | CHLOROFORM-D   |
| Sweep Width (Hz)       | 8000.00      | Temperature (degree C) | 29.000                   | Number of Transients | 32             |

0.92(ddd, <sup>1</sup>H, J=7.32, 6.84 Hz)

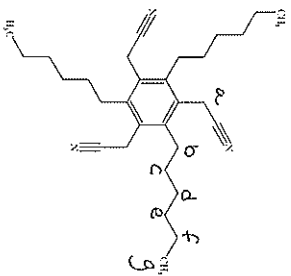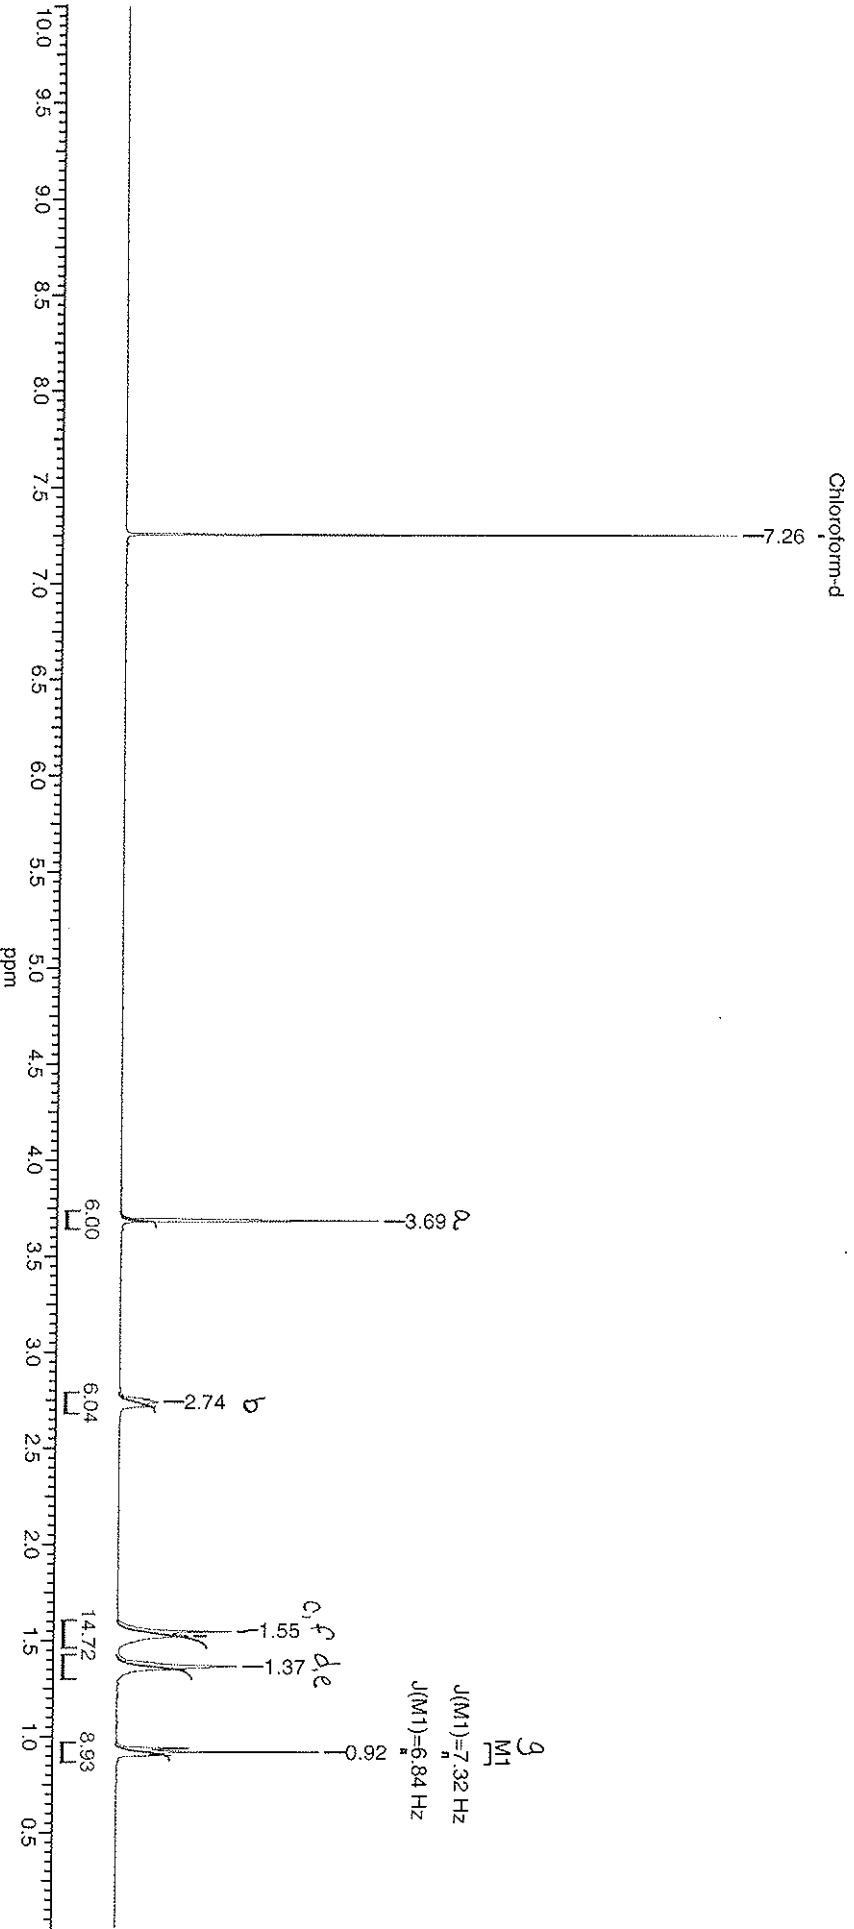

# Cyanide Addition t-Butyl

Meg Collins  
MLC.II.209 Cyanide Addition t-Butyl

|                        |                   |                        |                                     |                |                      |    |
|------------------------|-------------------|------------------------|-------------------------------------|----------------|----------------------|----|
| Acquisition Time (sec) | 2.0480            | Comment                | MLC.II.209 Cyanide Addition t-Butyl | Date           | May 15 2003          |    |
| File Name              | E:\209CyanAddtBut | Points Count           | 32768                               | Nucleus        | <sup>1</sup> H       |    |
| Original Points Count  | 32768             | Temperature (degree C) | 29.000                              | Solvent        | CHLOROFORM-D         |    |
| Sweep Width (Hz)       | 8000.00           | Frequency (MHz)        | 399.95                              | Pulse Sequence | s2pul                |    |
|                        |                   |                        |                                     |                | Number of Transients | 32 |

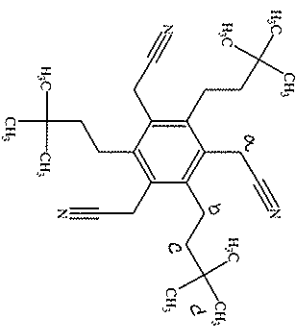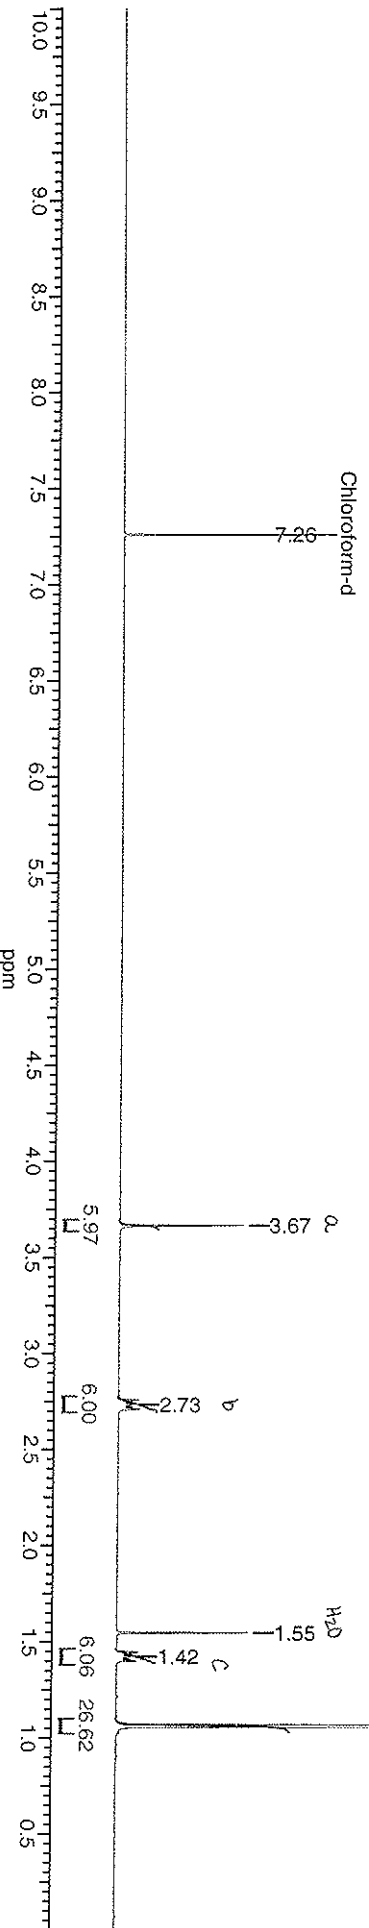

# Propyl Aminoethyl

|                        |                |                                                  |                            |                  |             |
|------------------------|----------------|--------------------------------------------------|----------------------------|------------------|-------------|
| Acquisition Time (sec) | 2.0480         | Comment                                          | STANDARD PROTON PARAMETERS | Date             | Sep 10 2007 |
| File Name              | hsunds4.scs    | ujuc.edu\Katzellenbogen-vxr500\moores\ML Cpropyl |                            | Frequency (MHz)  | 499.43      |
| Nucleus                | <sup>1</sup> H | Number of Transients                             | 32                         | Points Count     | 32768       |
| Pulse Sequence         | s2pul          | Solvent                                          | METHANOL-D4                | Sweep Width (Hz) | 8000.00     |
| Temperature (degree C) | 29.000         |                                                  |                            |                  |             |

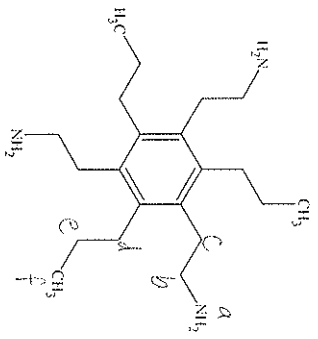

MeOH  
Methanol-d4

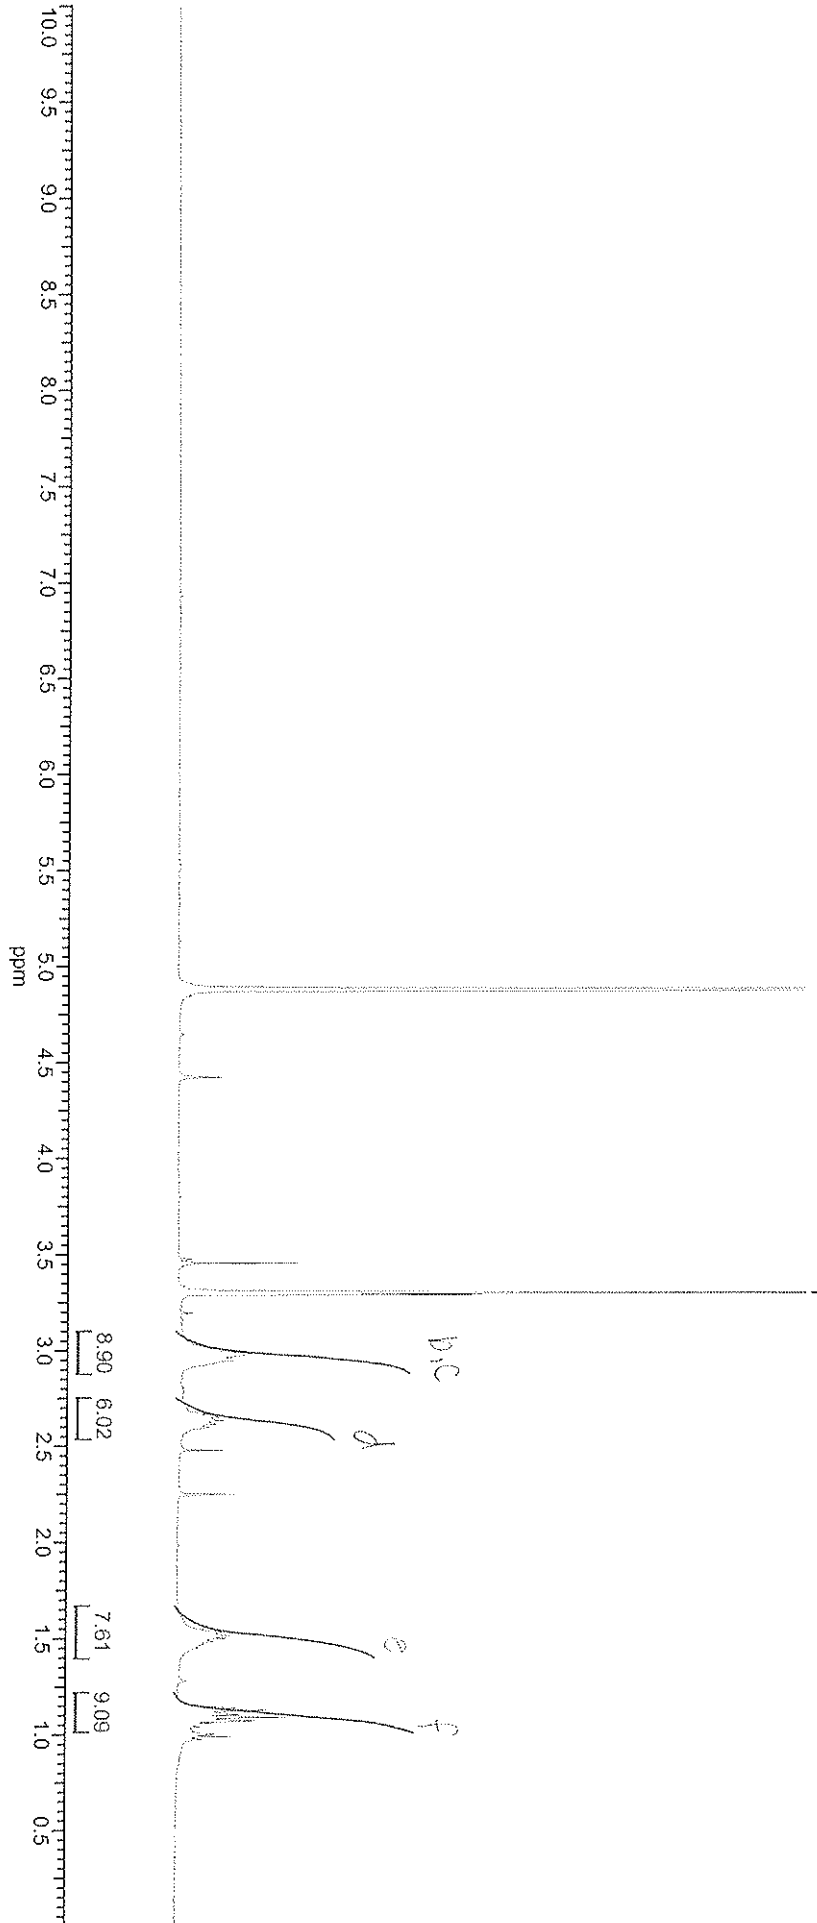



# Aminoethyl Butyl

Meg Collins  
MLC.II.181 Reduction Nitrite HCl Salt

| Acquisition Time (sec) | 2.0480           | Comment                | MLC.II.181 Reduction Nitrite HCl Salt | Date                   | May 7 2003     | Number of Transients | 32          |
|------------------------|------------------|------------------------|---------------------------------------|------------------------|----------------|----------------------|-------------|
| File Name              | E:\181RedNItHCl2 | Points Count           | 32768                                 | Nucleus                | <sup>1</sup> H | Solvent              | METHANOL-D4 |
| Original Points Count  | 32768            | Temperature (degree C) | 29.000                                | Frequency (MHz)        | 399.95         | Pulse Sequence       | s2pul       |
| Sweep Width (Hz)       | 8000.00          | Temperature (degree C) | 29.000                                | Temperature (degree C) | 29.000         |                      |             |

1.00(t, 2H, J=7.20 Hz)

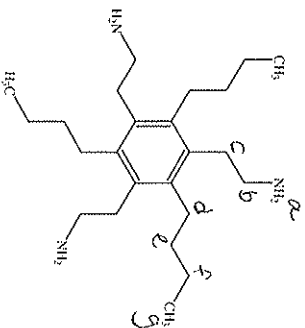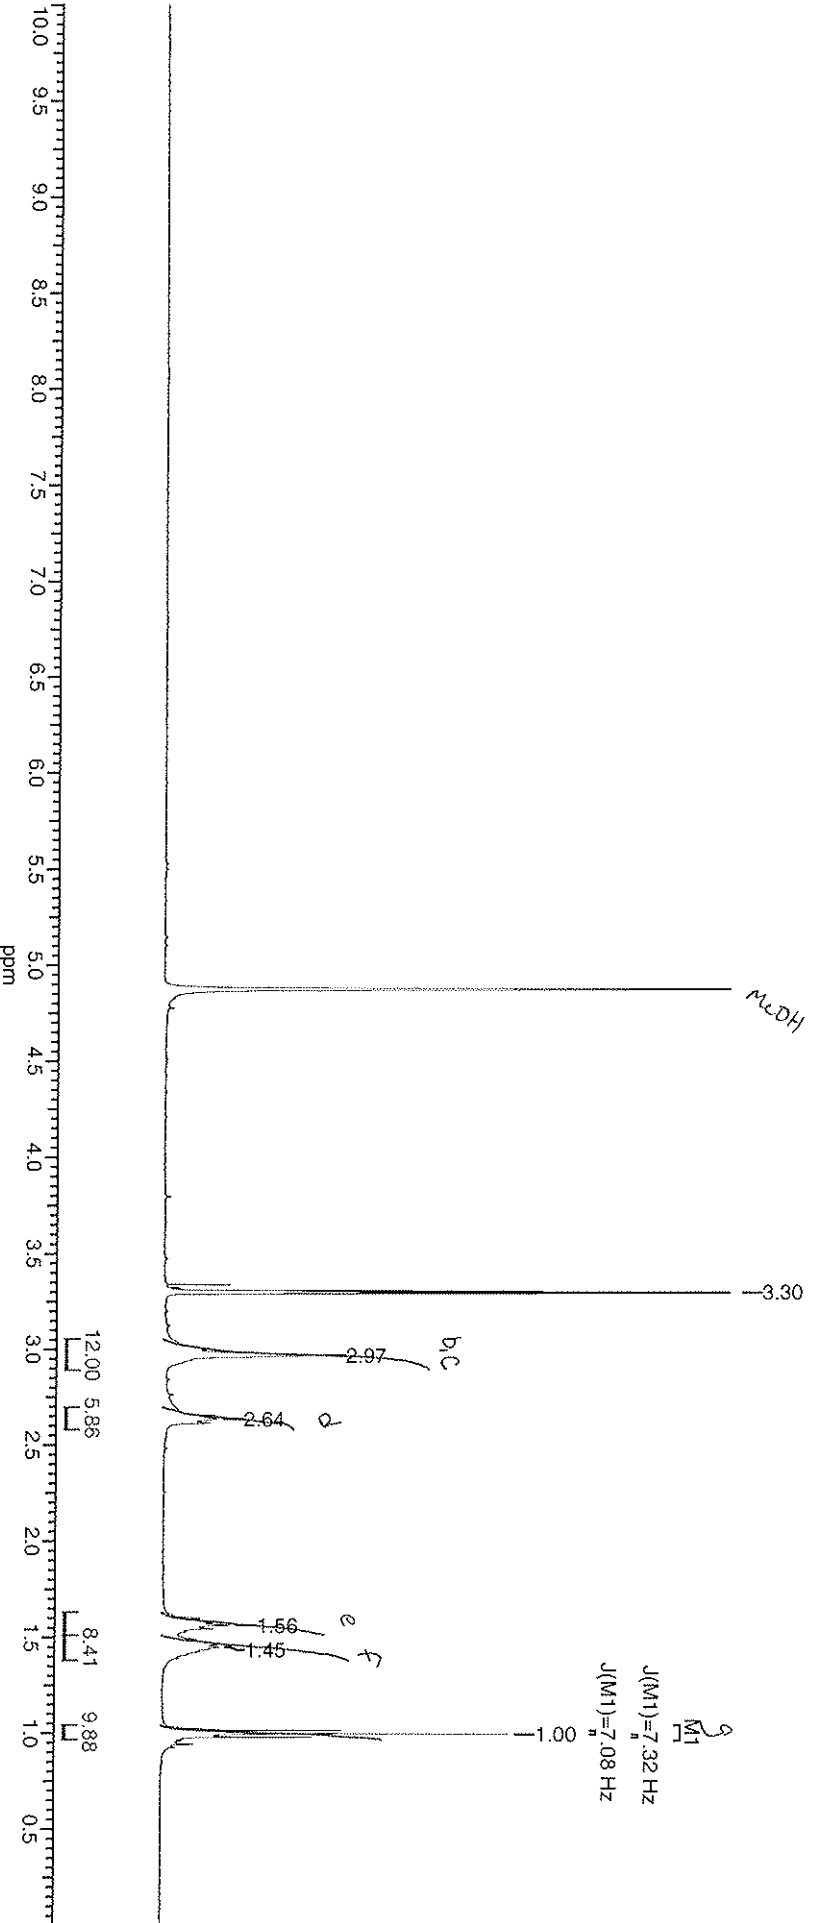

# Pentyl Aminoethyl

Meq Collins  
MLC.III.91 Pentyl Aminoethyl

|                        |                |                        |                              |                      |                |
|------------------------|----------------|------------------------|------------------------------|----------------------|----------------|
| Acquisition Time (sec) | 2.0480         | Comment                | MLC.III.91 Pentyl Aminoethyl | Date                 | Aug 11 2004    |
| File Name              | Z:\91PentAmEih | Frequency (MHz)        | 399.95                       | Nucleus              | <sup>1</sup> H |
| Original Points Count  | 32768          | Points Count           | 32768                        | Pulse Sequence       | s2pul          |
| Sweep Width (Hz)       | 8000.00        | Temperature (degree C) | 29.000                       | Solvent              | METHANOL-D4    |
|                        |                |                        |                              | Number of Transients | 32             |

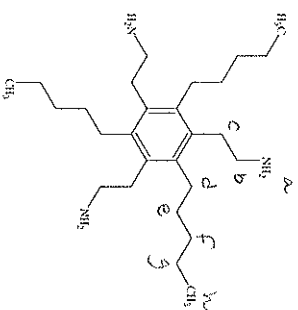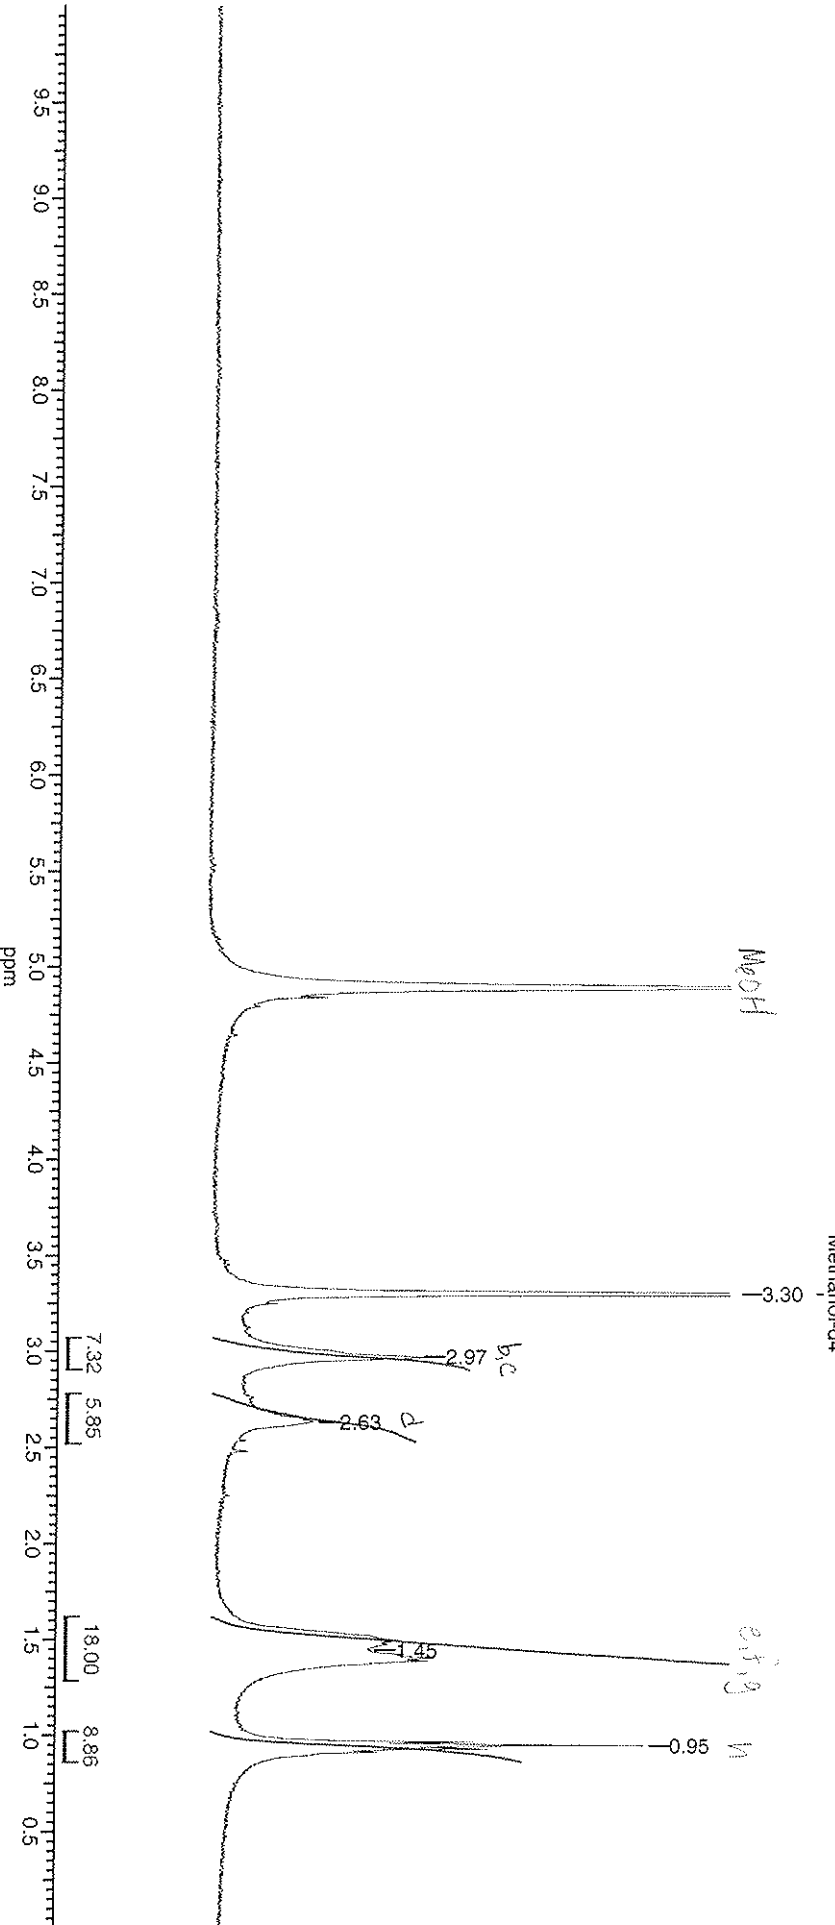

# Hexyl Aminoethyl

|                        |                   |                        |             |                         |         |             |                      |    |
|------------------------|-------------------|------------------------|-------------|-------------------------|---------|-------------|----------------------|----|
| Acquisition Time (sec) | 2.0480            | Comment                | MLC.III.101 | Reduction Nitrite Hexyl | Date    | Aug 10 2004 | Number of Transients | 32 |
| File Name              | Z:\101RedNitHexPl | Points Count           | 32768       | Frequency (MHz)         | Nucleus | 1H          |                      |    |
| Original Points Count  | 32768             | Temperature (degree C) | 29.000      | Pulse Sequence          | Solvent | METHANOL-D4 |                      |    |
| Sweep Width (Hz)       | 8000.00           |                        |             |                         |         |             |                      |    |

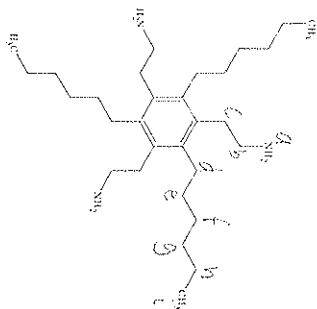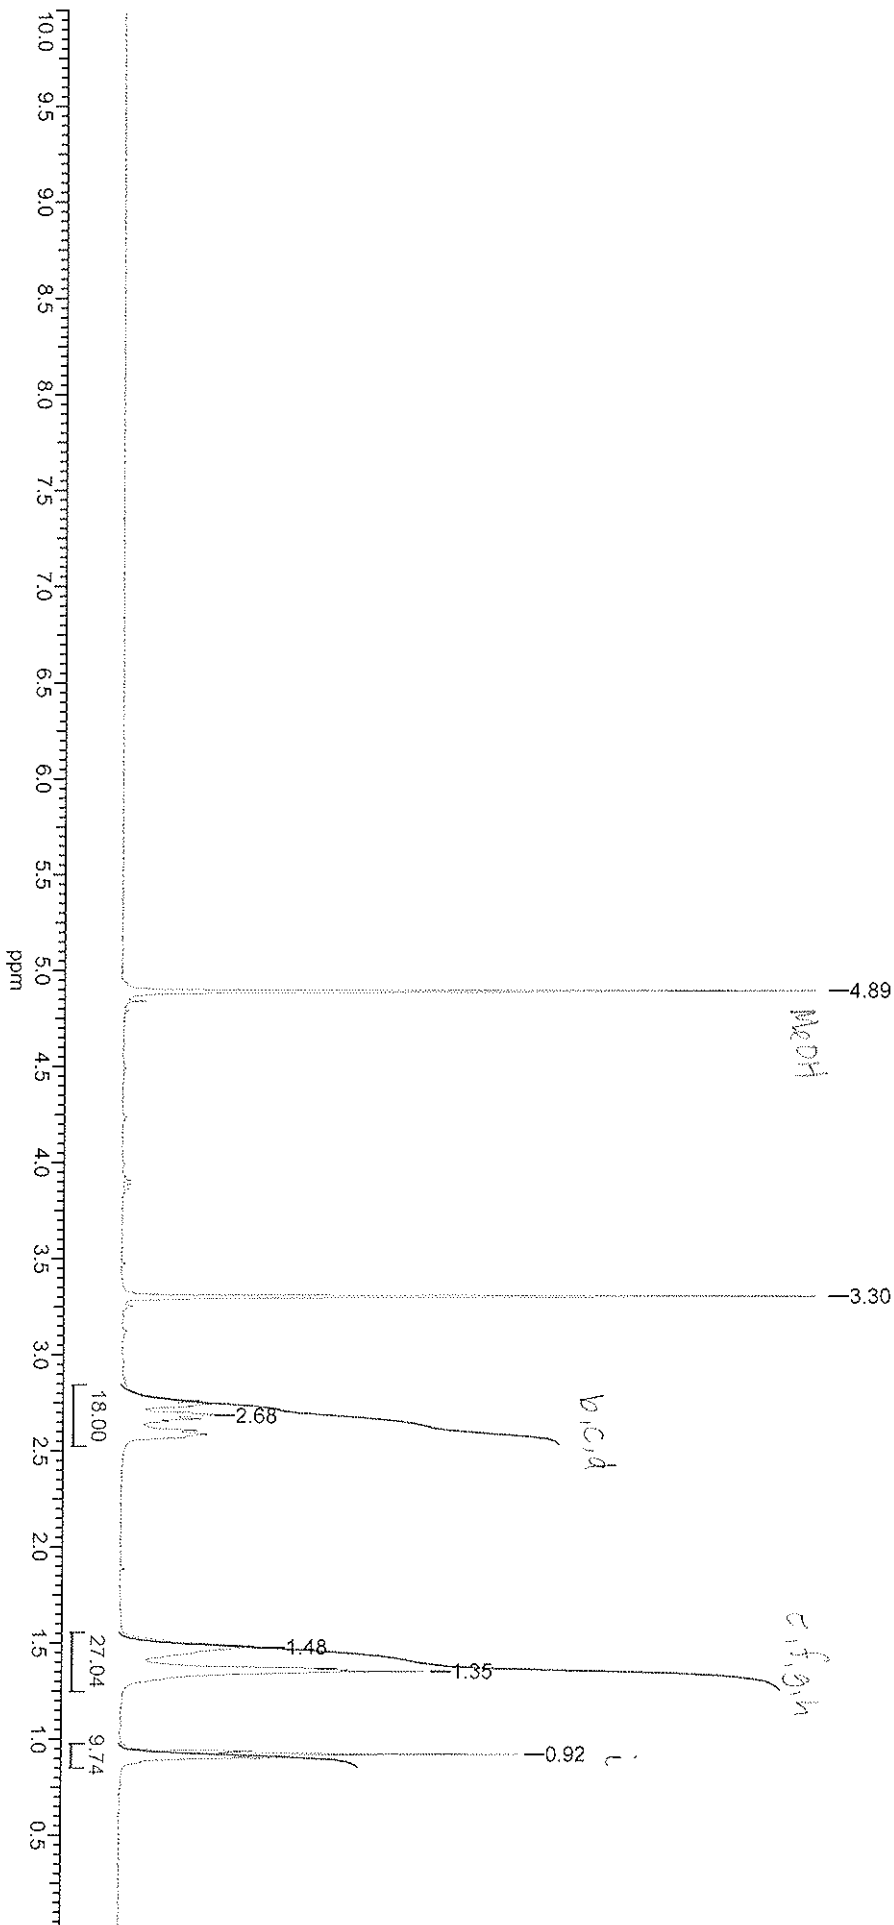

# Neohexyl Ethylamine

Meg Collins  
MLC.III.63 Neohexyl Ethylamine

|                        |                    |                        |                                |                |                      |
|------------------------|--------------------|------------------------|--------------------------------|----------------|----------------------|
| Acquisition Time (sec) | 2.0480             | Comment                | MLC.III.63 Neohexyl Ethylamine | Date           | May 15 2004          |
| File Name              | E:\63NeohexEthAmin | Points Count           | 32768                          | Nucleus        | <sup>1</sup> H       |
| Original Points Count  | 32768              | Temperature (degree C) | 29.000                         | Solvent        | METHANOL-D4          |
| Sweep Width (Hz)       | 8000.00            | Frequency (MHz)        | 399.95                         | Pulse Sequence | s2pul                |
|                        |                    |                        |                                |                | Number of Transients |
|                        |                    |                        |                                |                | 32                   |

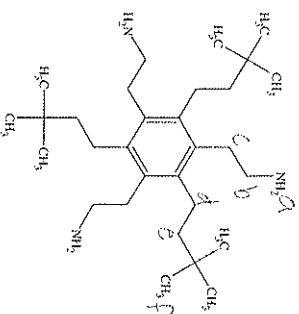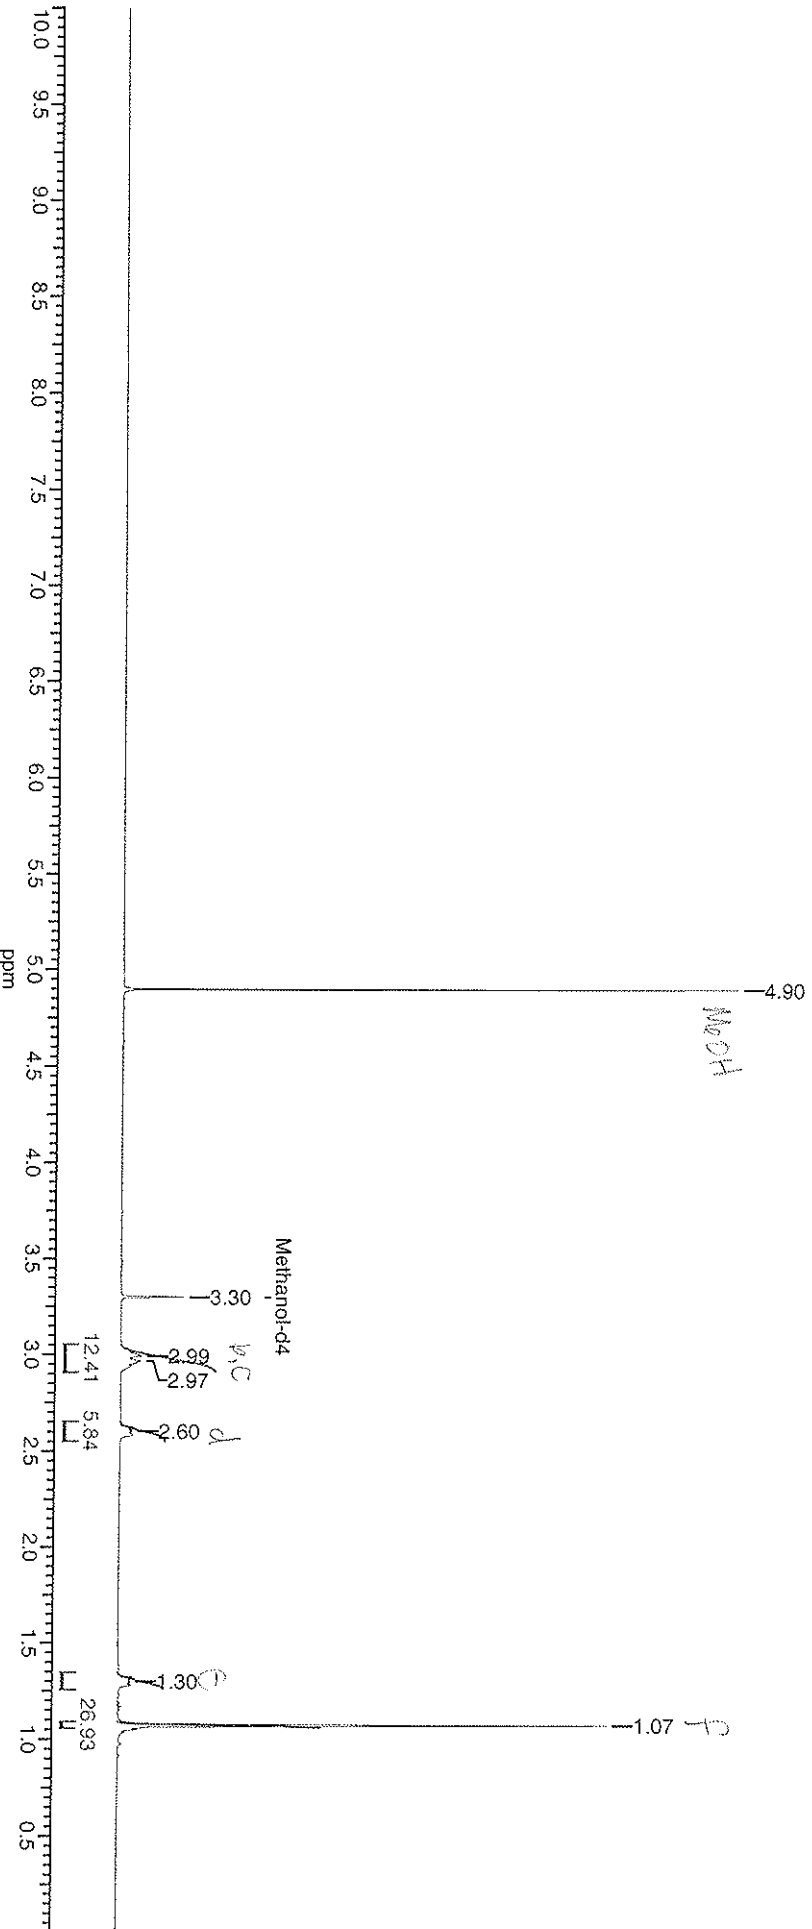

Supplement: NIHMS49596-supplement-1.pdf [file NIHMS49596-supplement-1.pdf]
